1 **Inducible epithelial resistance improves survival of Sendai virus pneumonia in**  
2 **mice by both inactivating virus and preventing CD8<sup>+</sup> T cell-mediated**  
3 **immunopathology**

4 **Authors:** S. Wali<sup>1,2</sup>, J. R. Flores<sup>2</sup>, A.M. Jaramillo<sup>2</sup>, D. L. Goldblatt<sup>2</sup>, J. Pantaleón  
5 García<sup>2</sup>, M. J. Tuvim<sup>2</sup>, B. F. Dickey<sup>2</sup>, S. E. Evans<sup>1,2</sup>.

6 **Author affiliations:**

7 <sup>1</sup>MD Anderson UTHealth Graduate School of Biomedical Sciences, Houston Texas  
8 77030.

9 <sup>2</sup>University of Texas MD Anderson Cancer Center, Department of Pulmonary Medicine,  
10 Houston Texas 77030.

11 **To whom correspondence should be addressed:** Scott E. Evans, M.D.

12 6565 MD Anderson Blvd

13 Houston TX 77030

14 Email: seevans@mdanderson.org

15 Telephone: 713-563-7433

16

17 **Abstract**

18 Viral pneumonias remain a global health threat necessitating novel strategies to prevent  
19 and treat these lower respiratory tract infections. We have reported that mice treated  
20 with a combination of inhaled Toll-like receptor (TLR) 2/6 and TLR 9 agonists (Pam2-

21 ODN) are broadly protected against respiratory pathogens. Although a single inhalation  
22 of Pam-ODN prevents acute morbidity and chronic complications associated with viral  
23 pneumonias, the mechanisms underlying this protection remain incompletely elucidated.  
24 Here, we show in a lethal paramyxovirus model that Pam2-ODN-enhanced survival is  
25 associated with robust virus inactivation that occurs prior to internalization by lung  
26 epithelial cells. However, it was also noted that viral mortality in sham-treated mice  
27 temporally corresponded with CD8<sup>+</sup> T cell-enriched lung inflammation that peaks after  
28 the viral burden wanes. Pam2-ODN treatment also blocked this injurious inflammation,  
29 but the attenuation of lymphocytic inflammation and the reduction in virus burden were  
30 both lost when inducible reactive oxygen species generation was inhibited. Depleting  
31 CD8<sup>+</sup> T cells before or after viral challenge underscored the balanced roles of CD8<sup>+</sup> T  
32 cells in antiviral immunity and fatal immunopathology, but did not obviate the Pam2-  
33 ODN antiviral protection. These findings identify multifunctional inducible antiviral  
34 mechanisms and may reveal means to protect susceptible individuals against  
35 respiratory infections.

36

## 37 **Introduction**

38 Viruses are the most frequent cause of community acquired pneumonia in children and  
39 adults<sup>1</sup>. Respiratory viral infections result in significant morbidity and mortality in  
40 vulnerable subjects, exerting a tremendous health care burden<sup>1-4</sup>. In addition to causing  
41 acute disease, respiratory virus infections are often complicated by chronic lung  
42 pathologies, such as asthma induction, progression and exacerbation<sup>5-7</sup>. Therefore,

43 development of novel therapeutic anti-viral strategies is required to effectively prevent  
44 and treat respiratory infections and their associated chronic complications<sup>8-10</sup>.

45 While lung epithelial cells are the principal targets of most respiratory viruses, there is  
46 expanding evidence that lung epithelia are capable of generating anti-microbial  
47 responses<sup>7,11</sup>. We hypothesized that lung epithelial cells can be harnessed to control  
48 virus replication, thereby enhancing acute survival and reducing chronic complications  
49 of virus infections<sup>12-15</sup>. Our group has previously described the phenomenon of inducible  
50 epithelial resistance wherein the lungs' mucosal defenses can be broadly stimulated to  
51 protect against a wide range of respiratory pathogens, including viruses<sup>12-17</sup>. This  
52 protection is induced by a single inhalation of a combination treatment consisting of Toll  
53 like receptor (TLR) 2/6 and 9 agonists (Pam2-ODN) before or after viral challenge.  
54 While no individual leukocyte populations have been identified as critical for Pam2-  
55 ODN-induced resistance, lung epithelial cells are essential to the inducible anti-viral  
56 response<sup>12</sup>. Further, we have shown that Pam2-ODN mediated protection is dependent  
57 upon epithelial generation of reactive oxygen species (ROS) but, interestingly, does not  
58 require Type I interferons<sup>16,17</sup>. More recently, we have shown prevention of chronic  
59 virus-induced asthma in mice treated with Pam2-ODN but we have not clarified the anti-  
60 viral mechanisms<sup>18</sup>.

61 In this study, we investigated the mechanisms of Pam2-ODN enhanced mouse survival  
62 of paramyxovirus, Sendai virus (SeV) infection. We found that Pam2-ODN treatment not  
63 only reduced lung SeV burden but also decreased epithelial cell injury and host  
64 immunopathologic leukocyte responses to SeV infections. While CD8<sup>+</sup> T cells are  
65 known to contribute to virus clearance, it is shown here that CD8<sup>+</sup> T cells also cause

66 substantial mortality that can be prevented by Pam2-ODN treatment. Notably, Pam2-  
67 ODN-induced enhanced survival of SeV infection is effective even in CD8<sup>+</sup> T cell  
68 deficient conditions. Further, we demonstrate anti-viral mechanisms of inducible  
69 epithelial resistance, where virus particles are inactivated in a ROS-dependent manner  
70 prior to internalization by their epithelial targets.

## 71 **Results**

### 72 **Enhanced mouse survival of SeV infection by Pam2-ODN treatment**

73 Aerosolized Pam2-ODN treatment one day prior to SeV challenge increased mouse  
74 survival of SeV challenge and reduced mouse weight loss (Fig. 1a, b), similar to the  
75 protection observed against lethal influenza pneumonia<sup>12,15,16</sup>. The survival benefit was  
76 associated with reduced lung SeV burden, as measured by SeV M gene expression  
77 (Fig. 1c). Investigating the natural progression of infection revealed that SeV lung  
78 burden was maximal on day 5 and gradually decreased until falling below the limit of  
79 quantification (LOQ) by day 11 (Fig. 1d). Pam2-ODN pretreatment reduced SeV burden  
80 on all assessed days (Fig. 1d). Although the lethality of SeV infection was highly  
81 dependent on the inoculum size, we found that peak mortality paradoxically occurred  
82 around days 10 to 12 irrespective of inoculum size, despite the fact that SeV is  
83 essentially undetectable that long after challenge (Fig. 1a, d, e). Assessing the effect of  
84 Pam2-ODN on SeV burden in immortalized mouse epithelial cells (MLE-15) and primary  
85 mouse tracheal epithelial cells (mTEC), we found that Pam2-ODN treatment reduced  
86 SeV burden at every time point measured, reflecting the inducible antiviral capacity of  
87 isolated epithelial cells (Fig. 1f).

88

89 **Figure 1. Pam2-ODN enhances mouse survival of SeV infection and reduces lung**  
90 **virus burden.** Survival **(a)** and weight loss **(b)** of mice treated with PBS or Pam2-ODN  
91 one day prior to SeV virus challenge. **(c)** Mouse lung SeV burden 5 days after infection  
92 assessed by qPCR for Sendai Matrix (M) gene (Relative quantification, RQ to 18S)  
93 relative to 18S. **(d)** Time course of lung SeV burden in mice treated with PBS or Pam2-  
94 ODN; LOQ, limit of quantification. **(e)** SeV inoculum dependent mouse survival. **(f)** SeV  
95 burden assessed by qPCR in MLE-15 cells and primary mouse tracheal epithelial cells  
96 (mTEC) treated with PBS or Pam2-ODN 4h prior to SeV challenge. n=10 mice per  
97 group in survival plots, n=4 mice/group in virus burden experiments. \* $p < 0.05$ , \*\* $p < 0.005$ .

98

### 99 **Pam2-ODN treatment attenuates SeV-induced epithelial injury**

100 This temporal dissociation between peak virus burden and peak mortality led to the  
101 hypothesis that SeV-induced mortality may not be exclusively driven by excessive virus  
102 burden but may also result from untoward SeV-induced host immune response.  
103 Therefore, the acute changes in mouse lungs following SeV infection were  
104 characterized. We found increases in lung epithelial cleaved caspase 3 (cCasp3), a  
105 marker for programmed cell death, on days 7 to 11 after SeV infection (Fig. 2a, upper  
106 panel). Virus infection-related epithelial cell injury and death is typically associated with  
107 proliferative repair mechanisms<sup>19,20</sup>. Staining the infected mouse lung tissue for Ki67  
108 and EdU revealed maximum signals for both markers in the second week after infection  
109 (Fig. 2b-e, upper panel). These events of lung epithelial cell death and proliferation

110 coincided with the peak of mortality (day 12, Fig. 1e). Further, hematoxylin and eosin  
111 staining of lung tissues infected with SeV showed profound increases in inflammatory  
112 cells from days 7 to 10 with evidence of damaged airway and parenchymal tissue (Fig.  
113 2f). However, Pam2-ODN pretreatment of mice reduced epithelial cell injury and  
114 proliferation (Fig. 2a-e, lower panel). This temporal association of epithelial injury and  
115 death after viral clearance supported our hypothesis that mouse mortality caused by  
116 SeV infection is due in part to the host immune response to SeV infections.

117

118 **Figure 2. Pam2-ODN pretreatment reduces epithelial cell death and proliferation**  
119 **during acute SeV infection.** Cleaved caspase 3 (a) or Ki67 (b) positive cells in mouse  
120 lung epithelium after SeV infection with or without Pam2-ODN treatment (lower panel).  
121 EdU positive cells in axial (c), small airways (d) and parenchyma (e) after SeV infection  
122 with or without Pam2-ODN (lower panel). (f) Mouse lung histology following SeV  
123 challenge with or without Pam2-ODN. n=5 mice per condition. Scale bar = 100  $\mu$ m.  
124 \* $p$ <0.05.

125

### 126 **Pam2-ODN attenuates SeV-induced lymphocytic lung inflammation.**

127 To explore this hypothesis, the host leukocyte response to SeV infection was  
128 characterized. Differential Giemsa staining of bronchoalveolar lavage (BAL) cells  
129 revealed increased neutrophils on days 2 to 5 and increased macrophages on days 5 to  
130 8 (Fig. 3a, left and middle panel, solid grey line) after SeV challenge. Congruent with  
131 our prior studies, inhaled treatment with Pam2-ODN in the absence of infection led to a

132 rapid rise in neutrophils that was resolved within 5 days (Fig 3a, dashed line)<sup>21</sup>. The  
133 neutrophil response to SeV challenge was modestly increased among mice pretreated  
134 with Pam2-ODN (Fig. 3a, left panel, solid dark line). Pam2-ODN-treated, SeV-  
135 challenged mice showed almost no difference in macrophages compared to PBS-  
136 treated, SeV-challenged mice (Fig. 3a, middle panel, solid dark line). A rise in  
137 lymphocytes was observed on days 8 to 11 in PBS-treated, SeV-challenged mice (Fig.  
138 3a, right panel, solid grey line), temporally corresponding with peak mortality. However,  
139 Pam2-ODN treated, SeV-challenged mice displayed significantly reduced lymphocyte  
140 numbers at every time point assessed (Fig 3a, right panel, solid dark line). The gating  
141 strategy for lymphocyte subsets by flow cytometry is shown in Supplementary Fig. 1. A  
142 modest reduction in CD4<sup>+</sup> T cells was observed in Pam2-ODN-treated, SeV-challenged  
143 mice compared to PBS-treated, SeV-challenged mice (Supplementary Fig. 2). We also  
144 found the percentage of CD19<sup>+</sup> B220<sup>+</sup> B cells reduced after SeV infection in comparison  
145 to Pam2-ODN treated and uninfected mice (Supplementary Fig. 2), as has been seen  
146 with other viral models<sup>22,23</sup>. However, the biggest difference between groups was in  
147 CD8<sup>+</sup> T cells, with Pam2-ODN-treated, SeV-challenged mice displaying a significantly  
148 lower number and percentage of CD8<sup>+</sup> T cells than PBS treated, SeV-challenged mice  
149 (Fig. 3b, c). Since the greatest difference after Pam2-ODN treatment was in CD8<sup>+</sup> T cell  
150 levels and there was a tight correlation between peak mortality and the increase in lung  
151 CD8<sup>+</sup> T cells on days 8 to 11, we investigated the role of CD8<sup>+</sup> T cells in SeV-induced  
152 mortality.

153

154 **Figure 3. Pam2-ODN pretreatment reduces SeV induced CD8<sup>+</sup> T cells. (a)**

155 Differential Giemsa staining of BAL cells from mice challenged with SeV with or without  
156 Pam2-ODN pretreatment. **(b)** Flow cytometry for CD8<sup>+</sup> T cells following SeV infection  
157 with or without Pam2-ODN. **(c)** Lung CD8<sup>+</sup> T cells 11 days after SeV challenge in mice  
158 pretreated with PBS or Pam2-ODN. \* $p < 0.05$

159

160 **CD8<sup>+</sup> T cells contribute to anti-viral immunity but also cause lethal**  
161 **immunopathology**

162 To assess the role of CD8<sup>+</sup> T cells in SeV defense and host mortality, mouse CD8<sup>+</sup> T  
163 cells were depleted prior to SeV challenge (Fig. 4a, Supplementary Fig. 3). This  
164 depletion resulted in significantly reduced survival of SeV infection (Fig. 4b). The nearly  
165 90% mortality in SeV challenged CD8<sup>+</sup> T cell depleted mice (Fig. 4b) was associated  
166 with impaired viral clearance (Fig. 4c, Supplementary Fig. 4). This was not surprising,  
167 given the known role of CD8<sup>+</sup> T cells in virus clearance<sup>24-28</sup>. However, Pam2-ODN  
168 treatment still significantly enhanced survival of SeV challenge, even in the absence of  
169 CD8<sup>+</sup> T cells (Fig. 4b). This protection was again associated with reduced SeV burden  
170 compared to CD8<sup>+</sup> T cell-depleted, SeV-challenged mice without Pam2-ODN treatment  
171 (Fig. 4c, Supplementary Fig. 4). These results were congruent with our previous studies  
172 showing Pam2-ODN inducible resistance against bacterial pneumonia despite the lack  
173 of mature lymphocytes (*Rag1*<sup>-/-</sup>)<sup>12</sup>.

174 As it appeared likely that CD8<sup>+</sup> T cells contributed both beneficial (antiviral) and  
175 deleterious (immunopathologic) effects, we depleted the CD8<sup>+</sup> T cells on day 8 -- after



176 virus begin to clear but before peak mortality (Fig. 4d). Interestingly, mice depleted of  
177 CD8<sup>+</sup> T cells on day 8 displayed enhanced survival of SeV challenge compared to mice  
178 with intact CD8<sup>+</sup> T cells (Fig. 4e). Depletion of CD8<sup>+</sup> T cells was confirmed by flow  
179 cytometry in disaggregated lung cells 10 days after SeV challenge (Fig. 4f,  
180 Supplementary Fig. 3). We also assessed lung injury by H&E staining of lung tissue 10  
181 days after SeV challenge and found increased inflammation and epithelial cell damage  
182 in undepleted mice compared to CD8<sup>+</sup> T cell-depleted mice (Fig. 4g). This supported  
183 our hypothesis that, while CD8<sup>+</sup> T cells confer anti-viral immunity, they also contribute to  
184 fatal SeV-induced immunopathology.

185

186 **Figure 4. Pam2-ODN treatment reduces CD8<sup>+</sup> T cell mediated SeV induced**  
187 **immunopathology.** Experimental outline (a), survival (b) and SeV burden (c) 5 days  
188 after SeV challenge following PBS or Pam2-ODN treatment and with or without  
189 preinfection CD8<sup>+</sup> T cell depletion. Experimental outline (d), survival (e) and CD8<sup>+</sup> T  
190 cells (f) 10 days after SeV challenge following pretreatment with PBS or Pam2-ODN  
191 and with or without CD8<sup>+</sup> T cells depleted on day 8 of SeV challenge. (g) Lung histology  
192 10 days after SeV challenged with or without Pam2-ODN treatment and/or CD8<sup>+</sup> T cells.  
193 Scale bar = 100 μm. n=10 mice/group for survival in experiment a and b; n=16  
194 mice/group for survival in experiment d and e. \*\*\*\* $p < 0.0001$  compared to PBS,  
195 \*\*\* $p < 0.0005$  compared to PBS, \*\* $p < 0.005$  compared to PBS, # $p < 0.005$  compared to α  
196 CD8 Ab-PBS, † $p < 0.05$  compared to PBS, \* $p < 0.05$  compared to PBS, \* $p < 0.05$   
197 compared to α CD8 Ab-PBS, † $p < 0.05$  compared to α CD8 Ab-PBS.

198

199 **Pam2-ODN treatment leads to extracellular inactivation of virus particles**

200 As the antiviral protection consistently correlated with reduced viral burden, and as the  
201 reduced virus burden likely contributes to the reduced CD8<sup>+</sup> T cell levels, we sought to  
202 determine how Pam2-ODN-induced responses cause antiviral effects. We investigated  
203 whether the principal Pam2-ODN effect occurred before (extracellular) or after  
204 (intracellular) virus internalization into their epithelial targets. Using multiple methods to  
205 determine the effect of Pam2-ODN on SeV attachment, we found no differences in  
206 attachment (Fig. 5a-d). However, even though similar numbers of virus particles were  
207 attached to epithelial cells, when these attached virus particles were liberated from the  
208 epithelial cell targets, virus particles from Pam2-ODN-treated epithelial cells were less  
209 able to subsequently infect other naive epithelial cells (Fig. 5e, f). As the number of  
210 attached virus particles was the same, this difference in SeV burden in cells that  
211 received liberated virus particles from PBS vs Pam2-ODN treated cells indicated that  
212 SeV is inactivated prior to epithelial internalization.

213

214 **Figure 5. Pam2-ODN inhibits SeV without altering attachment. (a)** Flow cytometry to  
215 measure virus attachment to epithelial cells. **(b)** Percentage of SeV positive epithelial  
216 cells from **(a)**. **(c)** Representative examples of immunofluorescence for virus  
217 attachment. **(d)** Mean fluorescence intensity of SeV-exposed epithelial cells. **(e)**  
218 Experimental outline. **(f)** SeV M gene expression in MLE-15 cells (left) or primary  
219 tracheal epithelial cells (right) receiving liberated virus from cultures pretreated with PBS  
220 or Pam2-ODN prior to SeV infection. \* $p < 0.05$

221

222 **Pam2-ODN-induced epithelial ROS protect against SeV infection and CD8<sup>+</sup> T cell**  
223 **immunopathology**

224 The anti-influenza response initiated by Pam2-ODN requires epithelial generation of  
225 ROS from both NADPH-dependent dual oxidase and mitochondrial sources<sup>16,17</sup>.  
226 Extending these findings to the SeV model, an NADPH oxidase inhibitor (GKT 137831)  
227 fully abrogated the Pam2-ODN-induced anti-SeV response (Fig. 6a). Similarly,  
228 treatment with a combination of FCCP (uncoupler of oxidative phosphorylation) and  
229 TTFA (complex II inhibitor) obviated the Pam2-ODN-induced anti-SeV response (Fig.  
230 6b)<sup>16,17</sup>. Further, it was found that Pam2-ODN induced epithelial generation of ROS  
231 were required for inactivation of SeV prior to epithelial entry (Fig. 6c). Congruent with  
232 these *in vitro* and *ex vivo* studies, mice treated with FCCP-TTFA before Pam2-ODN  
233 treatment and SeV challenge (Fig. 6d) demonstrated reduced survival (Fig. 6e),  
234 increased SeV burden (Fig. 6f), and increased CD8<sup>+</sup> T cells on day 10 (Fig 6g).

235

236 **Figure 6. Pam2-ODN induced reactive oxygen species protects against acute SeV**  
237 **virus infections and immunopathology.** SeV burden in MLE-15 cells with or without  
238 treatment with Pam2-ODN and/or NADPH inhibitors **(a)** or mitoROS inhibitors **(b)**. **(c)**  
239 SeV M gene expression in MLE-15 cells receiving liberated virus from cells pretreated  
240 with PBS/Pam2-ODN with or without mitoROS inhibition. **(d)** Experimental outline. **(e)**  
241 Survival of SeV challenge in mice treated with PBS or Pam2-ODN and/or mtROS  
242 inhibitors. **(f)** Lung SeV burden measured on day 5 and **(g)** lung CD8<sup>+</sup> T cells assessed

243 on day 10. n=13 mice/group in experiment **d** and **e**. \*\*\* $p < 0.0001$ , \*\* $p < 0.005$ , \*\* $p < 0.01$   
244 compared to PBS, † $p < 0.05$  compared to Pam2-ODN, \* $p < 0.05$ , \* $p < 0.01$ .

245

## 246 **Discussion**

247 In this study, we demonstrate that therapeutic stimulation of lung epithelial cells  
248 enhances mouse survival of acute SeV infections by both reducing the virus burden and  
249 attenuating host immunopathology. While our group has demonstrated inducible  
250 resistance against multiple respiratory pathogens including viruses<sup>12-17,21</sup>, these studies  
251 demonstrate for the first time when in the virus lifecycle the anti-viral effects begin,  
252 substantiate the role of ROS in SeV protection, and reveal protective  
253 immunomodulatory effects.

254 While Pam2-ODN treatment provided a significant host survival benefit in SeV infection,  
255 we observed this survival difference occurring even after the PBS-treated mice had  
256 cleared the virus. This observation prompted the hypothesis that host mortality is not the  
257 exclusive result of direct viral injury to the lungs, but due at least in part to the host  
258 response to the virus infections. Eliminating the anti-viral component of CD8<sup>+</sup> T cells in  
259 this model, we observed enhanced survival of SeV infections in mice depleted of CD8<sup>+</sup>  
260 T cells on day 8 (Fig. 4), revealing the importance of balancing the dual functions of  
261 CD8<sup>+</sup> T cells in anti-viral immunity and in causing fatal immunopathology. Our findings  
262 suggest that the surge in CD8<sup>+</sup> T cells within the lungs after most virus has been  
263 cleared causes physiologic impairment via lung injury and cell death (Fig 4d-g).  
264 However, Pam2-ODN treatment enhanced survival of SeV infections, reflecting the

265 intrinsic anti-viral capacity of the lung epithelial cells. This finding is potentially valuable  
266 in the context of treating pneumonia in immunocompromised patients.

267 Previous reports support this concept of counter-balanced immune protection and  
268 immunopathology by CD8<sup>+</sup> T cells during virus infections<sup>24,28-32</sup>. Some reports have  
269 shown that antigen-experienced memory CD8<sup>+</sup> T cells enhance respiratory syncytial  
270 virus (RSV) clearance, but also mediate severe immunopathology<sup>30,33</sup>. However, our  
271 study is the first to demonstrate the survival advantage of paramyxovirus infections by  
272 either temporal depletion of enhanced CD8<sup>+</sup> T cells or by inducible epithelial resistance.  
273 Our findings are also congruent with reports on the role of CD8<sup>+</sup> T cells in non-  
274 respiratory viral infection models, such as in West Nile virus infection, where CD8<sup>+</sup> T cell  
275 deficient mice display decreased mortality<sup>31</sup>. Findings from this study and others reveal  
276 that the harmful effects of CD8<sup>+</sup> T cell mediated immunopathology may supersede the  
277 benefits of T cell mediated viral clearance. Therefore, it is appealing to develop  
278 inducible anti-microbial strategies that do not rely on conventional T cell-mediated  
279 microbial clearance and are also effective in vulnerable immune deficient  
280 populations<sup>12,16,34,35</sup>.

281 Although the CD8<sup>+</sup> T cell depletion studies enhanced our understanding of  
282 immunopathology in virus infections, much of the survival benefit against SeV infection  
283 was presumably mediated by anti-viral effects induced by Pam2-ODN. This led us to  
284 investigate the mechanisms of these inducible anti-viral effects. Given the multiple steps  
285 in the virus life cycle, it was not known at what stage Pam2-ODN exerted its anti-viral  
286 effect. Exploring this, we found no difference in number of SeV particles attached to the  
287 cells between PBS and Pam2-ODN treatment (Fig 5a-d). However, attached virus

288 particles that were from Pam2-ODN treated cells retain less infective capacity when  
289 added to naïve epithelial cells, revealing pre-internalization virus inactivation by Pam2-  
290 ODN treatment (Fig 5e, f).

291 Knowing that Pam2-ODN inducible resistance required ROS production to protect  
292 against influenza<sup>16</sup>, we studied the role of ROS in Pam2-ODN-mediated reduction in  
293 SeV burden. ROS inhibition not only led to attenuation of Pam2-ODN's anti-viral effect  
294 but was also permissive for increased lung CD8<sup>+</sup> T cell numbers *in vivo*, implicating  
295 Pam2-ODN-induced ROS in preventing both identified mechanisms of mouse mortality  
296 in SeV pneumonia (Fig 6a, b, e, f). Further, ROS inhibition also led to loss of Pam2-  
297 ODN-inducible *in vitro* inactivation of SeV prior to epithelial internalization (Fig. 6c),  
298 demonstrating for the first time that epithelial ROS directly contribute to virus  
299 inactivation.

300 Production of ROS as a microbicidal mechanism has been widely reported in  
301 phagocytic cells<sup>36-38</sup>. However, this mechanism has not been extensively studied in non-  
302 phagocytic cells<sup>39</sup>, where it apparently acts predominantly extracellularly rather than  
303 intracellularly as in phagocytes. (Fig. 5f, g). Induction of a sustained microbicidal state  
304 through lung epithelial reprogramming can potentially explain the broad protection seen  
305 against multiple pathogens<sup>12-14,21,34,40</sup>. These findings of viral inactivation by epithelial  
306 ROS production reveal an essential component of inducible epithelial resistance.

307 Taken together, these findings provide mechanistic insights into the role of the lung  
308 epithelium in induction of anti-viral responses and prevention of host immunopathology  
309 that may inform future therapeutics to protect vulnerable populations.

310 **Methods**

311 **Mice:** All *in vivo* experiments were performed using 6 to 10-week-old C57BL/6J mice of  
312 a single sex purchased from (Jackson laboratory) or bred in-house according to the  
313 Institutional Animal Care and Use Committee of MD Anderson Cancer Center, protocol  
314 00000907-RN01.

315 **Cells:** Mouse lung epithelial (MLE-15) cells were kindly provided by Jeffrey Whitsett,  
316 Cincinnati Children's Hospital Medical Center, and cultured in DMEM with 2 % Fetal  
317 Bovine Serum (FBS), 1 % insulin and transferrin. MLE-15 cells were authenticated by  
318 the MD Anderson Characterized Cell Line Core Facility. To harvest tracheal epithelial  
319 cells, mice were anesthetized to expose and excise tracheas. These tracheas were then  
320 digested in pronase (1.5 mg/ml, Sigma Aldrich) overnight at 4<sup>o</sup> C. Tracheal epithelial  
321 cells were then isolated and cultured on collagen coated transwells in Ham's F12 media  
322 supplemented with differentiation growth factors and hormones as described  
323 previously<sup>16,35</sup>.

324 **TLR treatments and viral challenge:** For *in vitro* treatments, cells were treated with  
325 Pam2 (2.2 µM) and ODN (0.55 µM), 4 h before SeV inoculation as previously  
326 described<sup>16,17</sup>. For *in vivo* treatments, 10 ml solution of Pam2 (4 µM) and ODN (1 µM) in  
327 endotoxin free water was delivered by Aerotech II nebulizer (Biodex Medical Systems)  
328 driven by 10 l/min along CO<sub>2</sub> (5 %) in air for 30 minutes as previously described<sup>16,17</sup>.  
329 SeV was purchased from ATCC (Manassas, VA) and grown in Rhesus monkey cells  
330 obtained from Cell Pro labs (Golden Valley, MN). For *in vitro* inoculations, multiplicity of  
331 infection (MOI) of one was used. Unless otherwise stated, mice were challenged with 1  
332 x 10<sup>8</sup> plaque forming units (pfu) in PBS inserted into the oropharynx of mice, under

333 isoflurane anesthesia as described<sup>18</sup>. Mice were weighed before and daily after  
334 challenge as a measure of morbidity and criteria for euthanasia.

335 **Bronchoalveolar lavage and differential Giemsa staining:** Mouse tracheas were  
336 instilled with 1.5 ml of PBS through a 20-gauge cannula after deep sedation and  
337 approximately 1 ml of BAL fluid was collected. The BAL fluid was then spun down at 4°  
338 C at 300 g to collect the cells in the pellet. The cell pellet was resuspended in 1 ml of  
339 ice-cold PBS and 200 µl of this cell suspension was then subjected to cyto centrifugation  
340 at 300 g for 5 min. Cells were stained with Giemsa stain for differential counts  
341 determination and total cells were counted by hemocytometer.

342 **Flow cytometry:** For *in vivo* experiments, mouse lungs were perfused with 5 to 10 ml  
343 PBS, dissected, cut into 1 mm<sup>3</sup> pieces, and digested with collagenase/DNAse I (5  
344 mg/ml, Worthington biochemical) for 30 min at 37° C. After digestion, single cells were  
345 collected by passing through a 70 µm filter. These single cells were washed with FACS  
346 staining buffer (PBS supplemented with 1 % FBS) and stained for specific cell types, as  
347 indicated in the antibody table (Table 1). For *in vitro* experiments, MLE-15 cells were  
348 seeded on 24 well plates for treatment with Pam2-ODN and SeV inoculation. Cells were  
349 trypsinized and washed with FACS staining buffer 2X. Cells were blocked in 5 %  
350 donkey serum for 30 min before proceeding to staining with Rabbit SeV antibody (MBL  
351 International) overnight at 4° C, followed by staining with secondary Alexa488 anti-rabbit  
352 antibody (Jackson Immunologicals) for 1 h. Cells were fixed and acquired on BD LSR II  
353 (BD Biosciences) for Alexa488 positive cells.

354 **Immunofluorescence:** MLE-15 cells were grown on chamber slides (Labtek), treated  
355 with Pam2-ODN for 4 h before inoculation with SeV (MOI 1). Cells were then fixed with



356 2 % paraformaldehyde before staining with Rabbit SeV antibody (MBL International)  
357 and detected using a secondary anti-rabbit antibody. For each experimental condition,  
358 specimens were imaged using Olympus BX 60 microscope using identical parameters  
359 for time of exposure, color intensity, contrast and magnification. Images were then  
360 loaded on ImageJ software to calculate mean fluorescence intensity for each group.

361 **H&E staining:** Mouse lungs were fixed by intratracheal inflation with 10 % formalin for  
362 24 h, and then transferred to 70 % ethanol embedded in paraffin. Tissue blocks were  
363 then cut into 5  $\mu\text{m}$  sections, mounted onto frosted glass slides, deparaffinized with  
364 xylene, washed with ethanol, then rehydrated and stained with hematoxylin and eosin  
365 for morphological changes.

366 **Epithelial proliferation assays:** Mice were injected intraperitoneally with 0.1 ml EdU (1  
367 mg/mouse). After 24 h, lungs were inflated and fixed with 10 % formalin for 24 h at 4° C  
368 and then lungs were embedded in paraffin. Paraffin sections were cut into 5  $\mu\text{m}$   
369 transverse sections of the axial airway, between lateral branches 1 and 2. Lung sections  
370 were then stained following the Click-iT EdU Imaging Kit protocol for EdU (Abcam,)   
371 followed by staining with DAPI for 30 min at room temperature. Images were collected  
372 using Olympus BX 60 microscope using identical parameters for all conditions. Some  
373 lung sections were subjected to antigen retrieval and then stained for Ki67 (1:1000;  
374 Invitrogen) and cCasp3 (1:500; Cell Signaling). EdU, Ki67 or cCasp3 positive cells were  
375 quantified using cell counter plugin in ImageJ and normalized to DAPI positive cells in  
376 every field of view (number of fields surveyed per mouse sample = 3).

377

378 **CD8<sup>+</sup> T cell depletion:** Anti CD8- $\beta$  antibody (200  $\mu$ g/mouse, Bioxell) was delivered to  
379 mice intraperitoneally at indicated time points. CD8<sup>+</sup> T cell depletion was confirmed by  
380 flow cytometry analysis 24 to 48 h after depletion.

381 **Viral burden quantification:** For *in vivo* experiments, mouse lungs were collected 5  
382 days after SeV challenge. RNA from mouse lungs was extracted using the Qiagen  
383 RNeasy kit. 500 ng of total RNA was converted to cDNA using Biorad iScript cDNA  
384 conversion kit. Viral burden was determined by reverse transcription quantitative PCR  
385 (RT-qPCR) of the Sendai Matrix (M) protein normalized to house-keeping gene  
386 18SRNA. 18S forward primer – GTAACCCGTTGAACCCATT; reverse primer –  
387 CCATCCAATCGGTAGTAGCG. SeV M gene forward primer –  
388 ACTGGGACCCTATCTAAGACAT; reverse primer – TAGTAGCGGAAATCACGAGG.  
389 The Limit of quantification (LOQ) was established for the SeV qPCR assay as the  
390 highest dilution of the template still maintaining the linearity of the assay. The threshold  
391 cycle (CT) value of the LOQ was set as the lower limit for the assay.

392 **ROS inhibition *in vitro* and *in vivo*:** NADPH oxidase activity was inhibited by exposing  
393 the cells to GKT137831 (10  $\mu$ M; Selleckchem) 12 h prior to treatment with Pam2-ODN  
394 or PBS. Mitochondrial ROS production was inhibited using the combination of FCCP  
395 (400 nM, Cayman Chemicals) and TTFA (200  $\mu$ M, Cayman Chemicals) for 1 h before  
396 Pam2-ODN or PBS treatment. For *in vivo* experiments, mice were aerosolized with  
397 10 ml TTFA (200 mM) and FCCP (800  $\mu$ M) 2 h before Pam2-ODN aerosolization and 2  
398 h before SeV challenge and then again 4 days after SeV challenge<sup>16</sup>.

399 **Viral attachment assays:** MLE-15 cells were cultured in 24 well plates or chamber  
400 slides for treatment with Pam2-ODN and SeV inoculations. Cells were placed on ice 30

401 min before inoculation with SeV to prevent viral entry into the cells. 4 h after inoculation  
402 on ice, cells were vigorously washed 5X with media to remove unattached virus. Cells  
403 were then harvested to measure SeV burden using immunofluorescence or flow  
404 cytometry. For RT-qPCR assays, epithelial cells were treated with Pam2-ODN or PBS,  
405 followed by SeV infection on ice (to prevent viral entry into cells). Virus particles were  
406 allowed to attach to the epithelial targets for 4 h on ice. These cells were then  
407 extensively washed to remove unattached virus particles, and then the cells were lysed  
408 by passing through a syringe 10X. The liberated virus particles were then transferred to  
409 naïve epithelial cells that had no prior exposure to Pam2-ODN. SeV M gene expression  
410 was assessed by qPCR after 24 h of SeV replication in the new cells. The experimental  
411 design is illustrated in Fig 5e. In some experiments, mitoROS inhibitors (FFCP-TTFA)  
412 were used before Pam2-ODN treatment to determine the role of Pam2-ODN induced  
413 ROS in SeV inactivation prior to internalization.

414 **Statistics:** All statistical analysis was performed using GraphPad Prism software  
415 (Version 8 for Windows, GraphPad Software, La Jolla, CA). To determine pairwise  
416 differences in viral burden or cell numbers, Student's *t* test was used. Mouse survival  
417 analysis of viral challenges were analyzed using Mantel-Cox test. One-way analysis of  
418 variance (ANOVA) with multiple comparisons was used to determined differences  
419 between multiple experimental conditions.

420

421

422

423 **Supplementary materials:**

424 **Supplementary Figure 1.** Gating strategy for flow cytometry of lung T and B cells.

425 **Supplementary Figure 2.** Pam2-ODN pretreatment reduced SeV induced  
426 lymphocytes. Disaggregated mouse lung cells positive for CD4<sup>+</sup> T cells, CD19<sup>+</sup> B220<sup>+</sup> B  
427 cells, CD8<sup>+</sup> T cells assessed by flow cytometry in perfused lungs from mice treated with  
428 PBS or Pam2-ODN on various days of SeV challenge. \* $p < 0.05$  compared to PBS+SeV,  
429 \*\* $p < 0.01$  compared to PBS+SeV.

430 **Supplementary Figure 3.** CD8<sup>+</sup> T cell depleting antibody reduced lung CD8<sup>+</sup> T cells.

431 **Supplementary Figure 4.** Lung SeV burden 3, 5 and 7 days after SeV challenge in  
432 mice treated with PBS or Pam2-ODN with or without CD8<sup>+</sup> T cell depletion. \* $p < 0.05$   
433 compared to PBS treated group.

434

435

436

437

438

439

440

441

442

443

444 **Table 1**

| <b>Antibodies</b>    | <b>Vendor</b>     | <b>Catalogue numbers</b> |
|----------------------|-------------------|--------------------------|
| CD3                  | Tonbo             | 65-0031-U100             |
| CD4                  | Tonbo             | 60-0042-U100             |
| CD8                  | Tonbo             | 25-0081-U100             |
| Live dead            | Tonbo             | 13-0870-T500             |
| CD25                 | Biolegend         | 102038                   |
| Foxp3 Treg kit       | eBiosciences      | 72-5775                  |
| CD8-Depleting<br>Ab  | Bioxell           | BE0223-A025              |
| CD19                 | Biolegend         | 115507                   |
| B220                 | BD Biosciences    | 562922                   |
| Anti-SeV virus<br>Ab | MBL International | PD029                    |
| Ki67                 | Invitrogen        | MA5-14520                |
| cCasp3               | Cell signaling    | 9662S                    |

445

446 **Author contributions:**

447 S.W. designed and performed the experiments, analyzed the data, and wrote the

448 manuscript. J.R.F., A.M.J., D.L.G. and J.P.G performed experiments. M.J.T., B.F.D.

449 conceptualized the project and critically reviewed the data. S.E.E. conceptualized the  
450 project, designed experiments, provided critical evaluation of data and edited the  
451 manuscript.

#### 452 **Acknowledgments:**

453 The authors would like to thank Dr. Yongxing Wang for optimization of ROS inhibition  
454 experiments. M.J.T., B.F.D., and S.E.E. are authors on U.S. patent 8,883,174,  
455 “Stimulation of Innate Resistance of the Lungs to Infection with Synthetic Ligands.”  
456 M.J.T., B.F.D., and S.E.E. own stock in Pulmotect, Inc., which holds the commercial  
457 options on these patent disclosures. All other authors declare that no conflict of interest  
458 exists. This study was supported by NIH grants R01 HL117976, DP2 HL123229 and  
459 R35 HL144805 to S.E.E.

#### 460 **References:**

- 461 1 Ruuskanen, O., Lahti, E., Jennings, L. C. & Murdoch, D. R. Viral pneumonia.  
462 *Lancet* **377**, 1264-1275, doi:10.1016/S0140-6736(10)61459-6 (2011).
- 463 2 Mizgerd, J. P. Lung infection--a public health priority. *PLoS medicine* **3**, e76,  
464 doi:10.1371/journal.pmed.0030076 (2006).
- 465 3 Luckhaupt, S. E. *et al.* Influenza-associated hospitalizations by industry, 2009-10  
466 influenza season, United States. *Emerging infectious diseases* **18**, 556-562,  
467 doi:10.3201/eid1804.110337 (2012).
- 468 4 Thompson, W. W. *et al.* Mortality associated with influenza and respiratory  
469 syncytial virus in the United States. *Jama* **289**, 179-186 (2003).

- 470 5 Busse, W. W., Lemanske, R. F., Jr. & Gern, J. E. Role of viral respiratory  
471 infections in asthma and asthma exacerbations. *Lancet* **376**, 826-834,  
472 doi:10.1016/S0140-6736(10)61380-3 (2010).
- 473 6 Folkerts, G., Busse, W. W., Nijkamp, F. P., Sorkness, R. & Gern, J. E. Virus-  
474 induced airway hyperresponsiveness and asthma. *American journal of*  
475 *respiratory and critical care medicine* **157**, 1708-1720,  
476 doi:10.1164/ajrccm.157.6.9707163 (1998).
- 477 7 Holtzman, M. J. *et al.* Linking acute infection to chronic lung disease. The role of  
478 IL-33-expressing epithelial progenitor cells. *Annals of the American Thoracic*  
479 *Society* **11 Suppl 5**, S287-291, doi:10.1513/AnnalsATS.201402-056AW (2014).
- 480 8 Olin, J. T. & Wechsler, M. E. Asthma: pathogenesis and novel drugs for  
481 treatment. *Bmj* **349**, g5517, doi:10.1136/bmj.g5517 (2014).
- 482 9 Shaw, D. E., Green, R. H. & Bradding, P. Asthma exacerbations: prevention is  
483 better than cure. *Therapeutics and clinical risk management* **1**, 273-277 (2005).
- 484 10 Ukena, D., Fishman, L. & Niebling, W. B. Bronchial asthma: diagnosis and long-  
485 term treatment in adults. *Deutsches Arzteblatt international* **105**, 385-394,  
486 doi:10.3238/arztebl.2008.0385 (2008).
- 487 11 Byers, D. E. *et al.* Long-term IL-33-producing epithelial progenitor cells in chronic  
488 obstructive lung disease. *The Journal of clinical investigation* **123**, 3967-3982,  
489 doi:10.1172/JCI65570 (2013).
- 490 12 Cleaver, J. O. *et al.* Lung epithelial cells are essential effectors of inducible  
491 resistance to pneumonia. *Mucosal immunology* **7**, 78-88, doi:10.1038/mi.2013.26  
492 (2014).

- 493 13 Duggan, J. M. *et al.* Synergistic interactions of TLR2/6 and TLR9 induce a high  
494 level of resistance to lung infection in mice. *Journal of immunology* **186**, 5916-  
495 5926, doi:10.4049/jimmunol.1002122 (2011).
- 496 14 Evans, S. E. *et al.* Inhaled innate immune ligands to prevent pneumonia. *British*  
497 *journal of pharmacology* **163**, 195-206, doi:10.1111/j.1476-5381.2011.01237.x  
498 (2011).
- 499 15 Tuvim, M. J., Gilbert, B. E., Dickey, B. F. & Evans, S. E. Synergistic TLR2/6 and  
500 TLR9 activation protects mice against lethal influenza pneumonia. *PLoS One* **7**,  
501 e30596, doi:10.1371/journal.pone.0030596 (2012).
- 502 16 Kirkpatrick, C. T. *et al.* Inducible Lung Epithelial Resistance Requires Multisource  
503 Reactive Oxygen Species Generation To Protect against Viral Infections. *mBio* **9**,  
504 doi:10.1128/mBio.00696-18 (2018).
- 505 17 Ware, H. H. *et al.* Inducible lung epithelial resistance requires multisource  
506 reactive oxygen species generation to protect against bacterial infections. *PLoS*  
507 *One* **14**, e0208216, doi:10.1371/journal.pone.0208216 (2019).
- 508 18 Goldblatt, D. L. *et al.* Inducible epithelial resistance against acute Sendai virus  
509 infection prevents chronic asthma-like lung disease in mice. *British journal of*  
510 *pharmacology*, doi:10.1111/bph.14977 (2020).
- 511 19 Hines, E. A. *et al.* Comparison of temporal transcriptomic profiles from immature  
512 lungs of two rat strains reveals a viral response signature associated with chronic  
513 lung dysfunction. *PLoS One* **9**, e112997, doi:10.1371/journal.pone.0112997  
514 (2014).



- 515 20 Look, D. C. *et al.* Effects of paramyxoviral infection on airway epithelial cell Foxj1  
516 expression, ciliogenesis, and mucociliary function. *Am J Pathol* **159**, 2055-2069,  
517 doi:10.1016/S0002-9440(10)63057-X (2001).
- 518 21 Alfaro, V. Y. *et al.* Safety, tolerability, and biomarkers of the treatment of mice  
519 with aerosolized Toll-like receptor ligands. *Front Pharmacol* **5**, 8,  
520 doi:10.3389/fphar.2014.00008 (2014).
- 521 22 Bekker, V. *et al.* Epstein-Barr virus infects B and non-B lymphocytes in HIV-1-  
522 infected children and adolescents. *J Infect Dis* **194**, 1323-1330,  
523 doi:10.1086/508197 (2006).
- 524 23 Shearer, W. T. *et al.* Prospective 5-year study of peripheral blood CD4, CD8, and  
525 CD19/CD20 lymphocytes and serum Igs in children born to HIV-1 women. The  
526 P(2)C(2) HIV Study Group. *J Allergy Clin Immunol* **106**, 559-566,  
527 doi:10.1067/mai.2000.109433 (2000).
- 528 24 Hou, S., Doherty, P. C., Zijlstra, M., Jaenisch, R. & Katz, J. M. Delayed clearance  
529 of Sendai virus in mice lacking class I MHC-restricted CD8+ T cells. *Journal of*  
530 *immunology* **149**, 1319-1325 (1992).
- 531 25 Ostler, T., Davidson, W. & Ehl, S. Virus clearance and immunopathology by  
532 CD8(+) T cells during infection with respiratory syncytial virus are mediated by  
533 IFN-gamma. *Eur J Immunol* **32**, 2117-2123, doi:10.1002/1521-  
534 4141(200208)32:8<2117::AID-IMMU2117>3.0.CO;2-C (2002).
- 535 26 Graham, B. S., Bunton, L. A., Wright, P. F. & Karzon, D. T. Role of T lymphocyte  
536 subsets in the pathogenesis of primary infection and rechallenge with respiratory

- 537 syncytial virus in mice. *The Journal of clinical investigation* **88**, 1026-1033,  
538 doi:10.1172/JCI115362 (1991).
- 539 27 Jozwik, A. *et al.* RSV-specific airway resident memory CD8+ T cells and  
540 differential disease severity after experimental human infection. *Nat Commun* **6**,  
541 10224, doi:10.1038/ncomms10224 (2015).
- 542 28 Schmidt, M. E. & Varga, S. M. Cytokines and CD8 T cell immunity during  
543 respiratory syncytial virus infection. *Cytokine*, doi:10.1016/j.cyto.2018.07.012  
544 (2018).
- 545 29 Duan, S. & Thomas, P. G. Balancing Immune Protection and Immune Pathology  
546 by CD8(+) T-Cell Responses to Influenza Infection. *Front Immunol* **7**, 25,  
547 doi:10.3389/fimmu.2016.00025 (2016).
- 548 30 Schmidt, M. E. *et al.* Memory CD8 T cells mediate severe immunopathology  
549 following respiratory syncytial virus infection. *PLoS Pathog* **14**, e1006810,  
550 doi:10.1371/journal.ppat.1006810 (2018).
- 551 31 Wang, Y., Lobigs, M., Lee, E. & Mullbacher, A. CD8+ T cells mediate recovery  
552 and immunopathology in West Nile virus encephalitis. *J Virol* **77**, 13323-13334,  
553 doi:10.1128/jvi.77.24.13323-13334.2003 (2003).
- 554 32 Connors, T. J. *et al.* Airway CD8(+) T Cells Are Associated with Lung Injury  
555 during Infant Viral Respiratory Tract Infection. *Am J Respir Cell Mol Biol* **54**, 822-  
556 830, doi:10.1165/rcmb.2015-0297OC (2016).
- 557 33 Cannon, M. J., Openshaw, P. J. & Askonas, B. A. Cytotoxic T cells clear virus but  
558 augment lung pathology in mice infected with respiratory syncytial virus. *J Exp*  
559 *Med* **168**, 1163-1168, doi:10.1084/jem.168.3.1163 (1988).

- 560 34 Evans, S. E., Xu, Y., Tuvim, M. J. & Dickey, B. F. Inducible innate resistance of  
561 lung epithelium to infection. *Annu Rev Physiol* **72**, 413-435, doi:10.1146/annurev-  
562 physiol-021909-135909 (2010).
- 563 35 Leiva-Juarez, M. M. *et al.* Inducible epithelial resistance protects mice against  
564 leukemia-associated pneumonia. *Blood* **128**, 982-992, doi:10.1182/blood-2016-  
565 03-708511 (2016).
- 566 36 Forman, H. J. & Torres, M. Reactive oxygen species and cell signaling:  
567 respiratory burst in macrophage signaling. *American journal of respiratory and*  
568 *critical care medicine* **166**, S4-8, doi:10.1164/rccm.2206007 (2002).
- 569 37 Huang, J. *et al.* Activation of antibacterial autophagy by NADPH oxidases. *Proc*  
570 *Natl Acad Sci U S A* **106**, 6226-6231, doi:10.1073/pnas.0811045106 (2009).
- 571 38 Yang, C. S. *et al.* NADPH oxidase 2 interaction with TLR2 is required for efficient  
572 innate immune responses to mycobacteria via cathelicidin expression. *Journal of*  
573 *immunology* **182**, 3696-3705, doi:10.4049/jimmunol.0802217 (2009).
- 574 39 Paiva, C. N. & Bozza, M. T. Are reactive oxygen species always detrimental to  
575 pathogens? *Antioxid Redox Signal* **20**, 1000-1037, doi:10.1089/ars.2013.5447  
576 (2014).
- 577 40 Evans, S. E. *et al.* Stimulated innate resistance of lung epithelium protects mice  
578 broadly against bacteria and fungi. *Am J Respir Cell Mol Biol* **42**, 40-50,  
579 doi:10.1165/rcmb.2008-0260OC (2010).

580

Wali, Figure 1

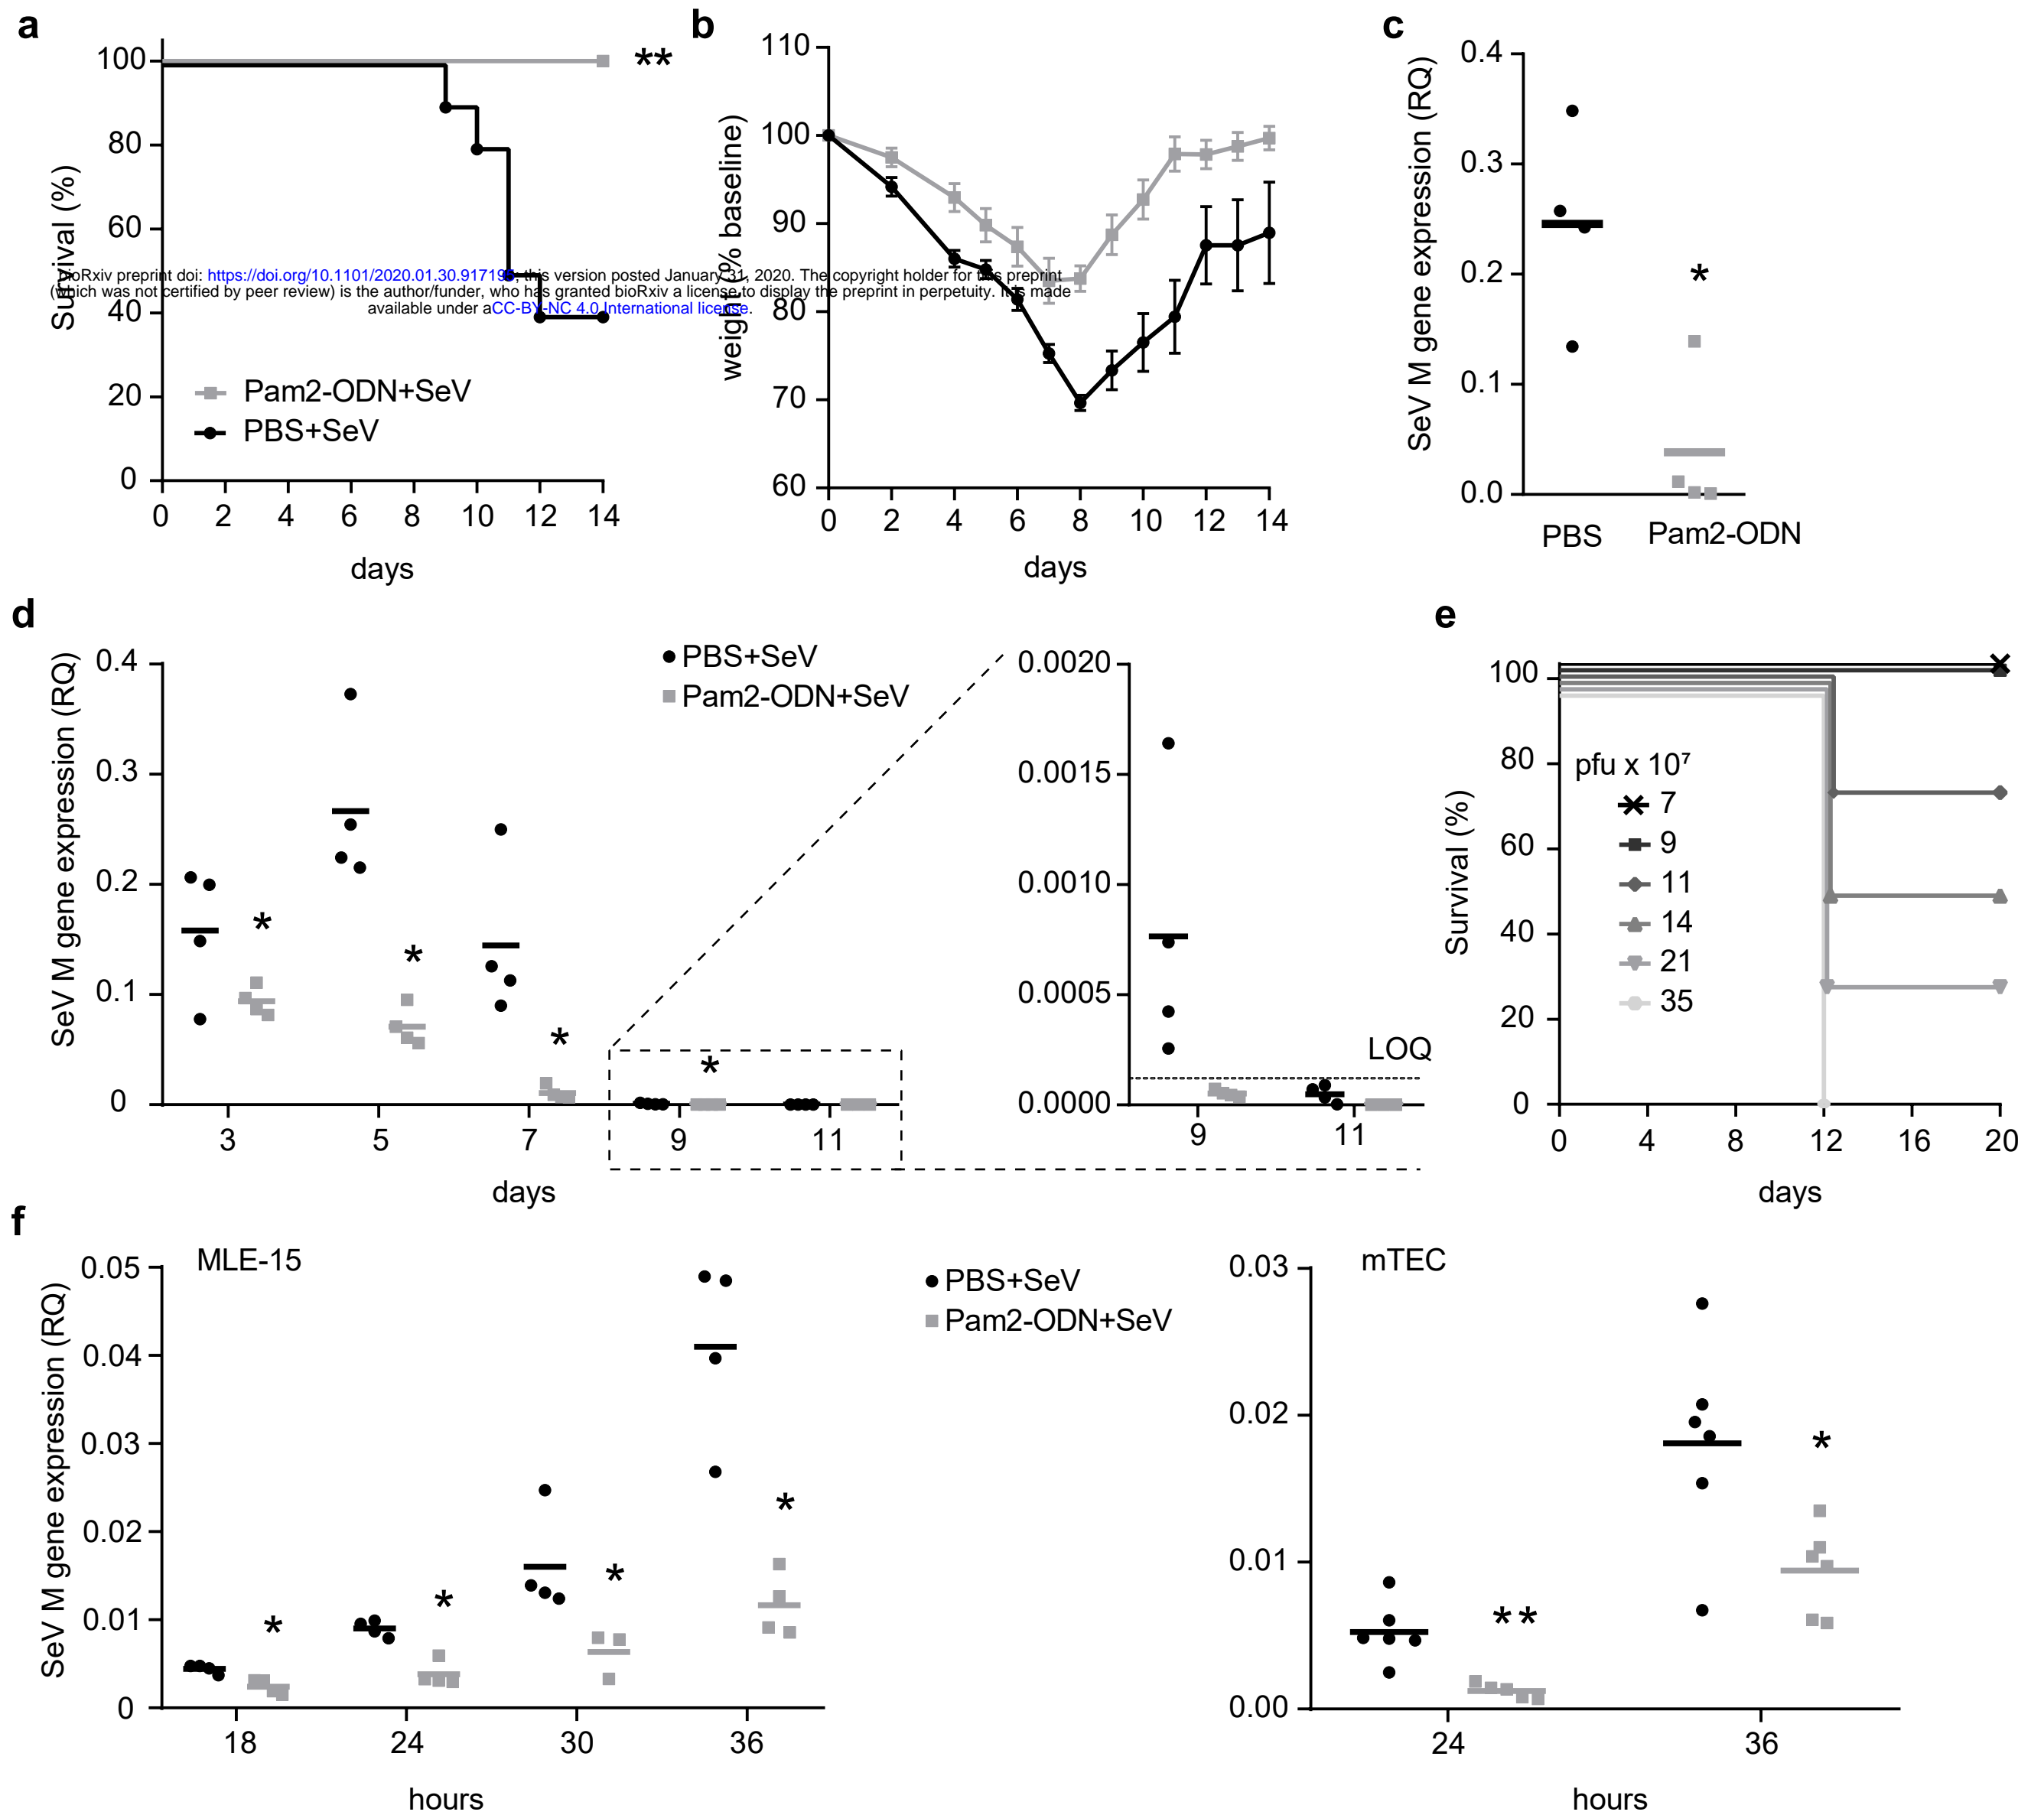



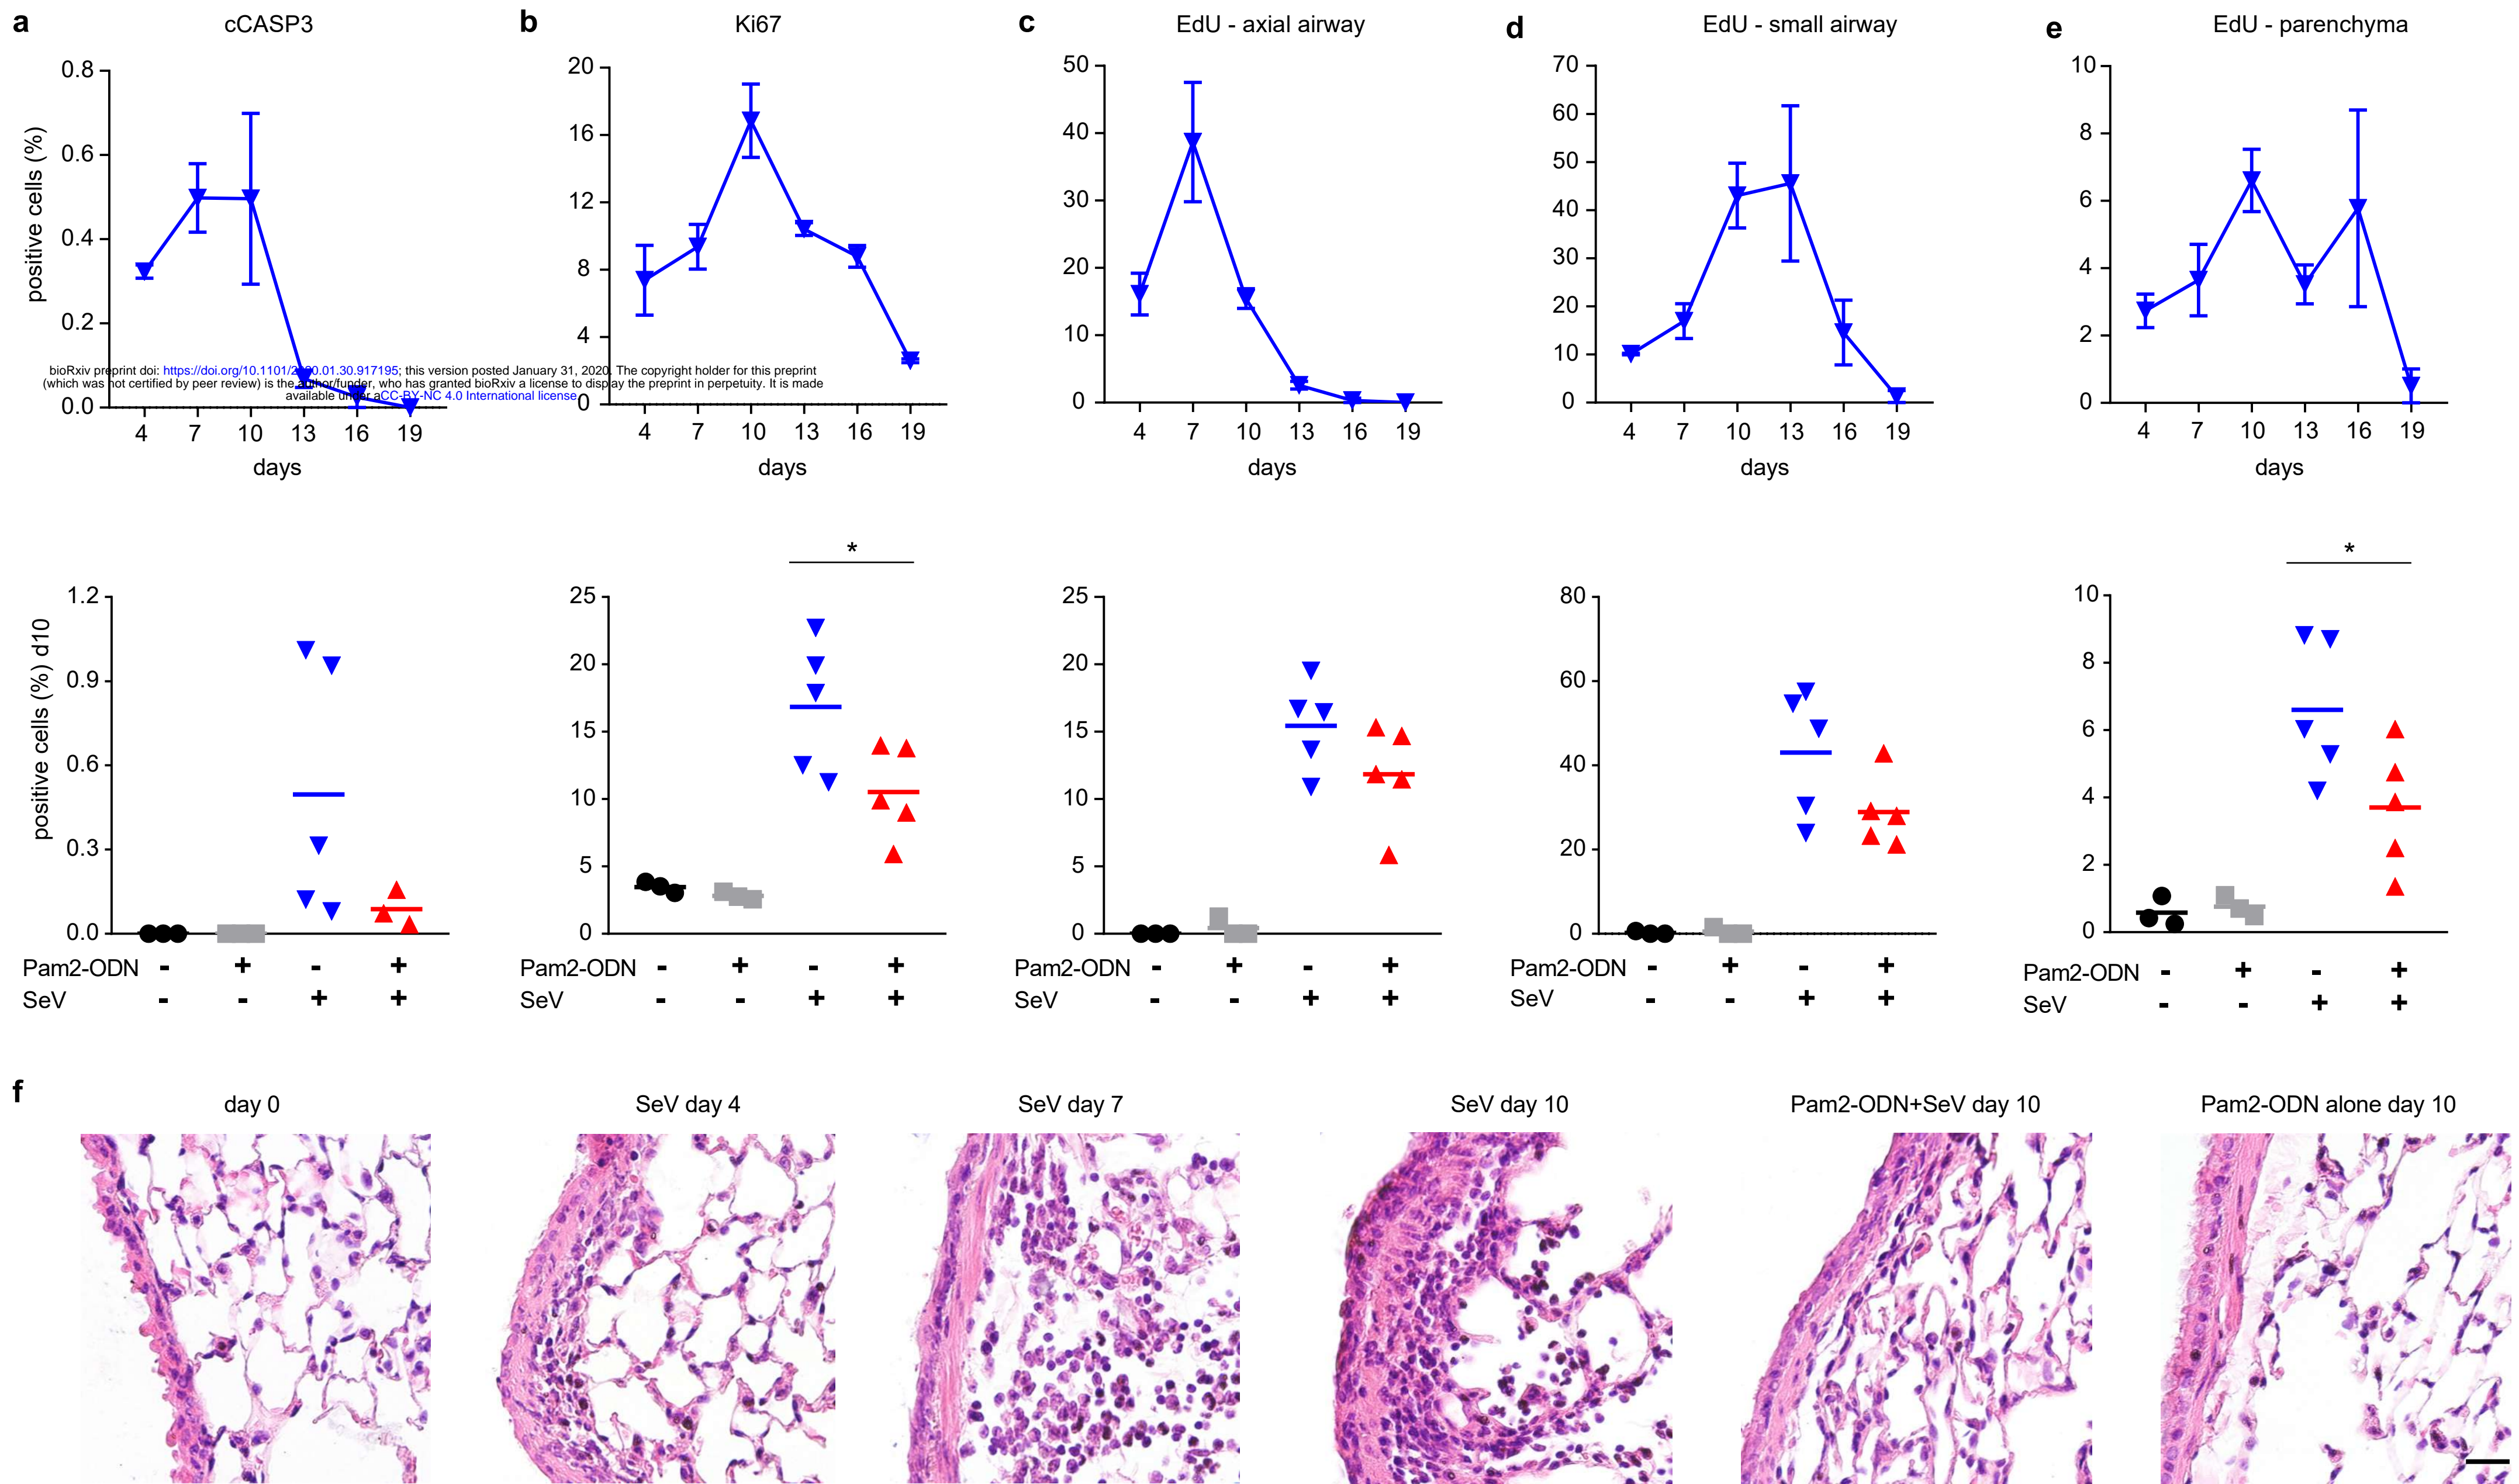

**a**

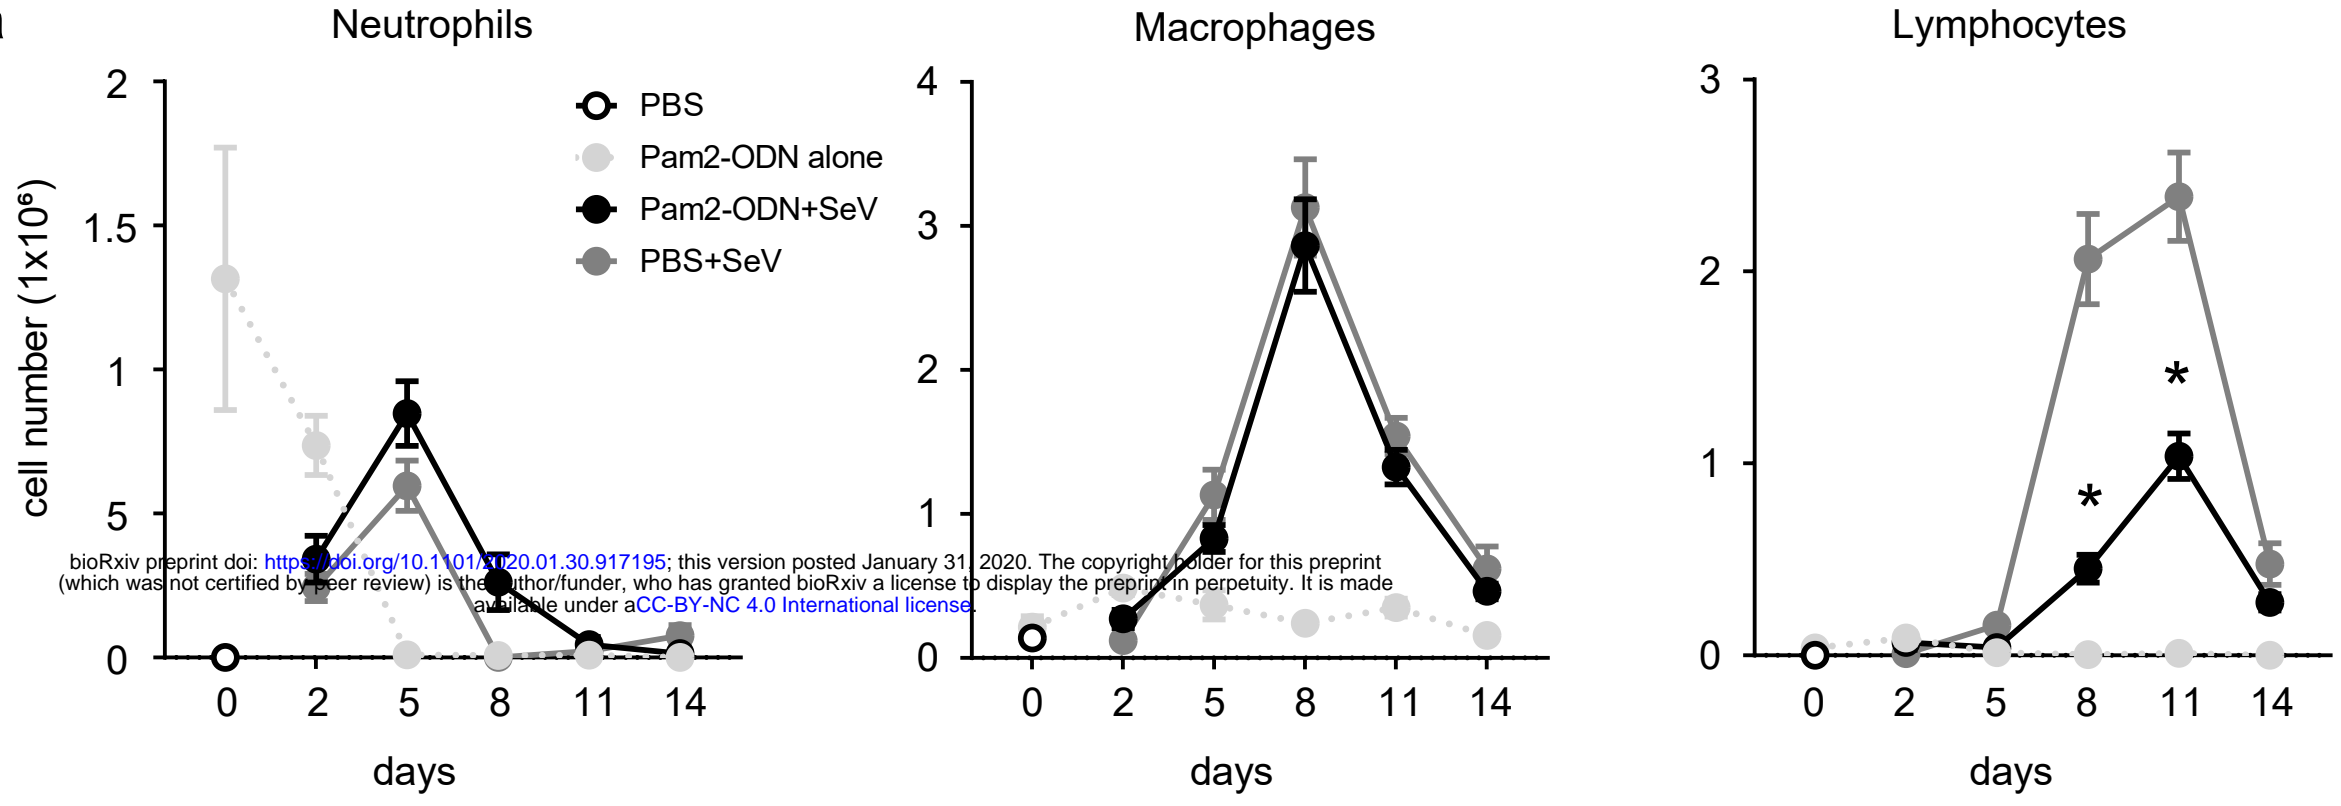

**b**

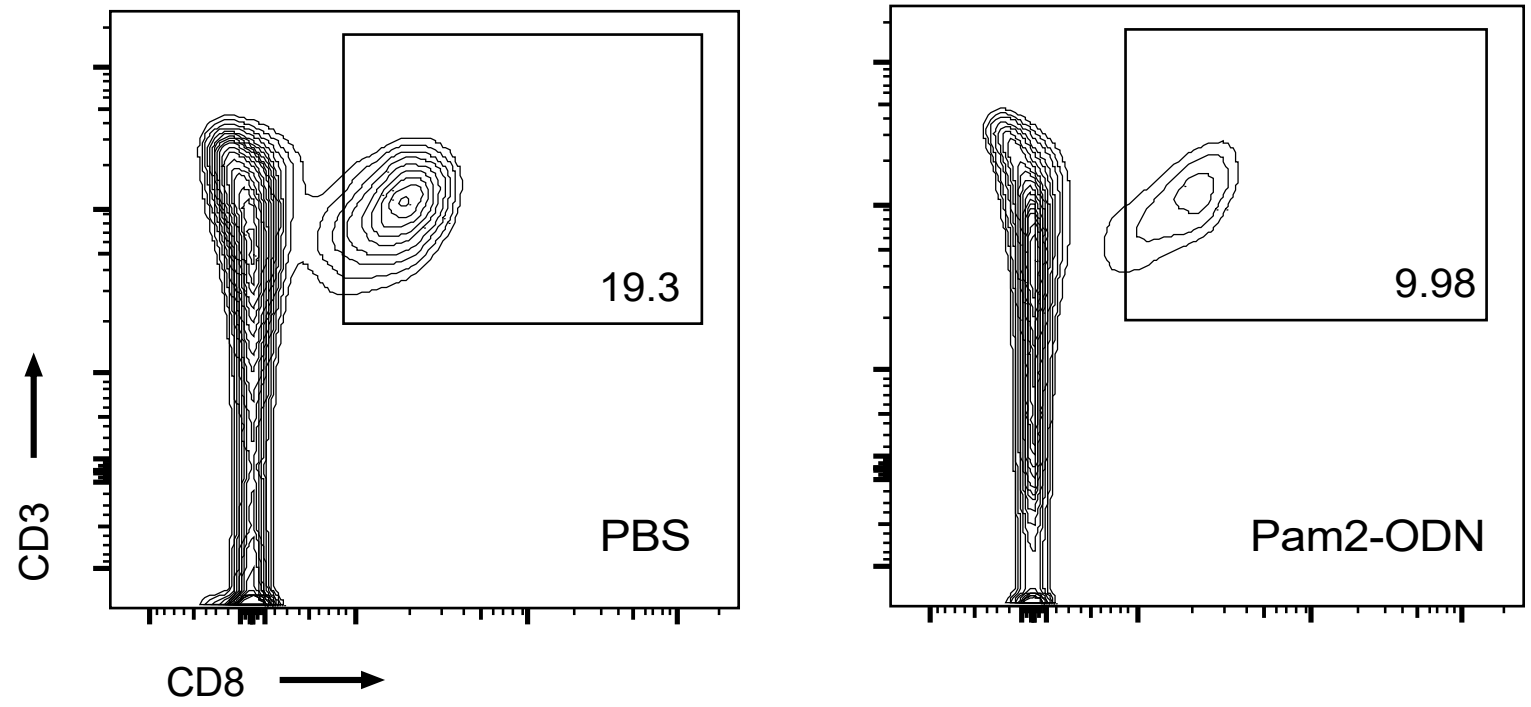

**c**

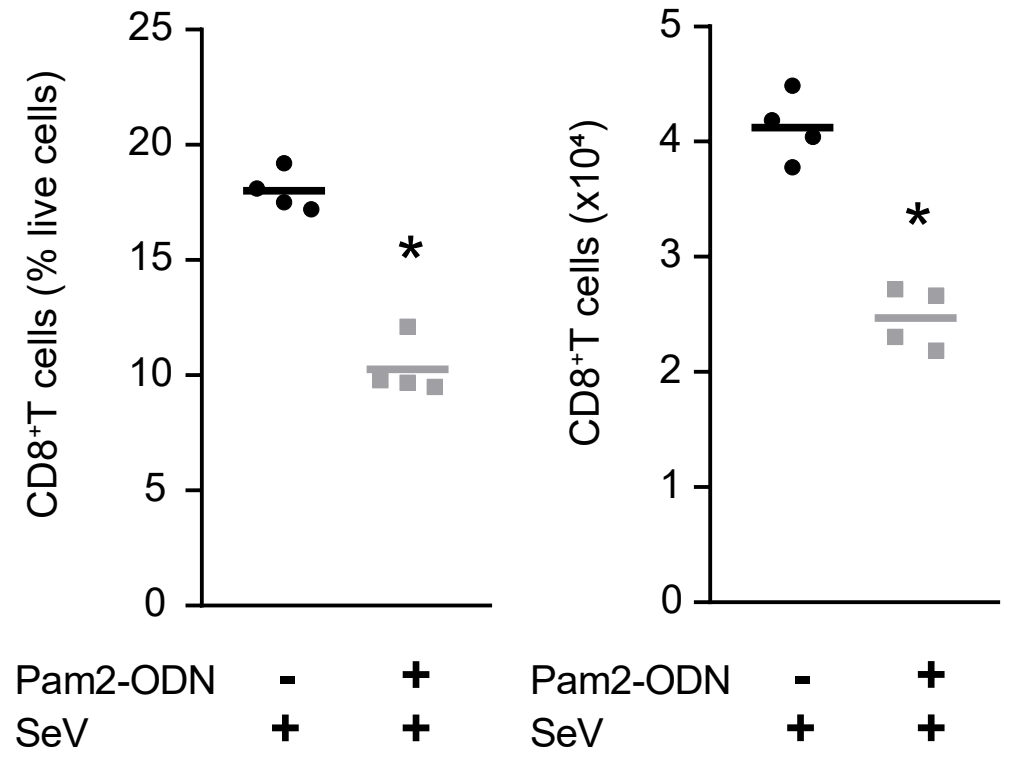



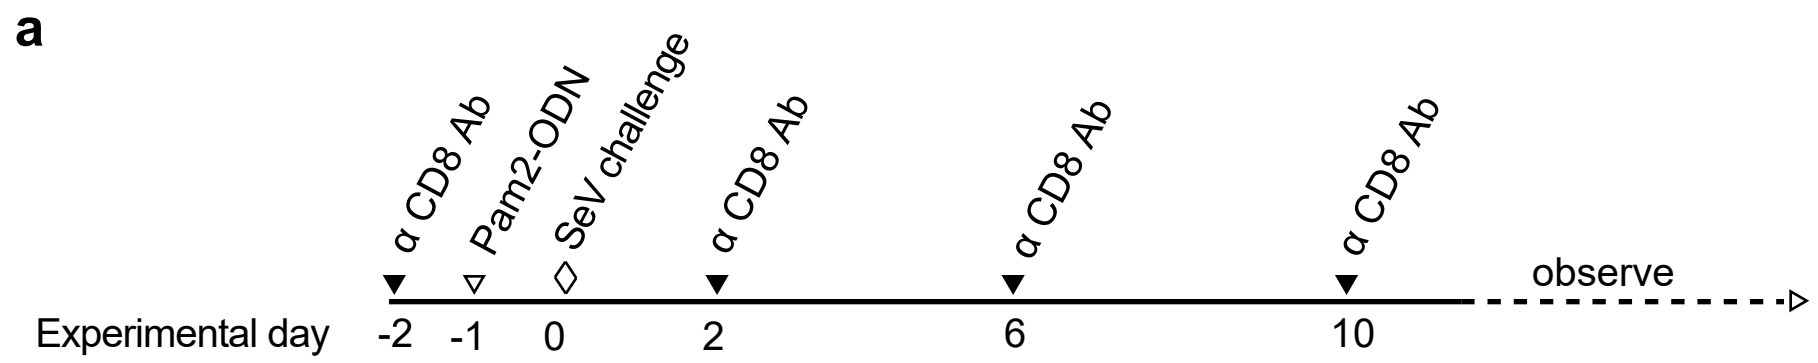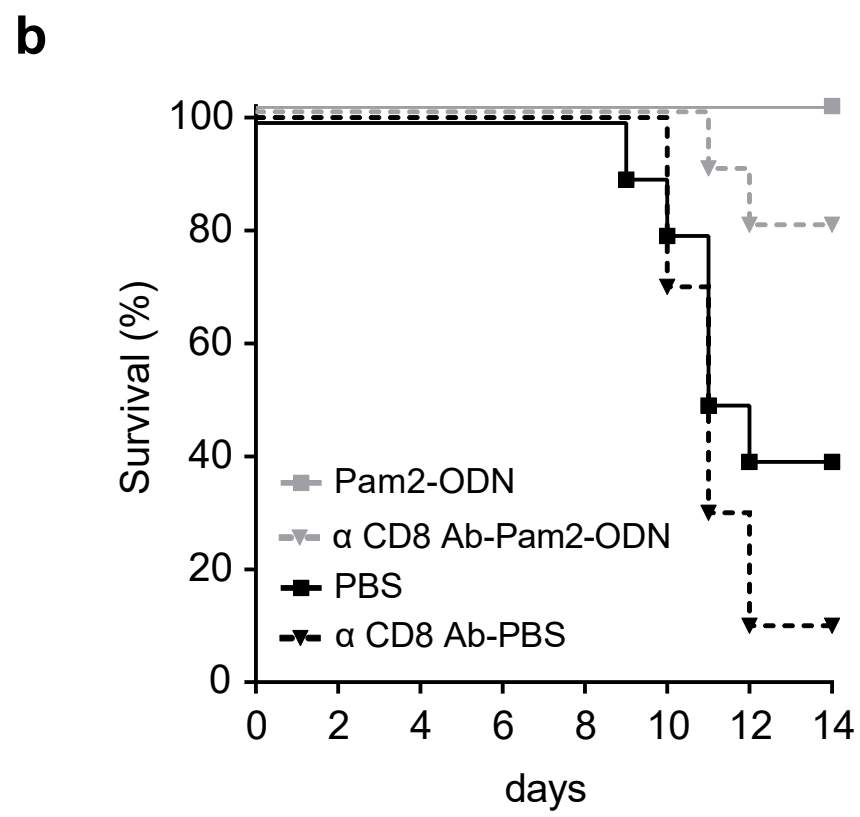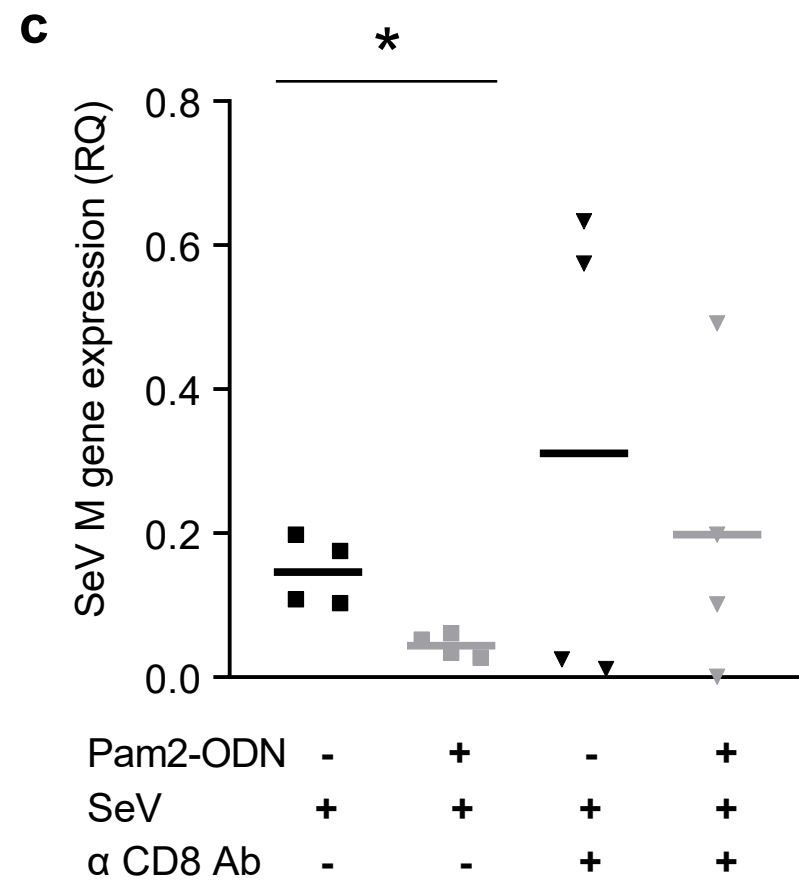

bioRxiv preprint doi: <https://doi.org/10.1101/2020.01.30.917195>; this version posted January 31, 2020. The copyright holder for this preprint (which was not certified by peer review) is the author/funder, who has granted bioRxiv a license to display the preprint in perpetuity. It is made available under aCC-BY-NC 4.0 International license.

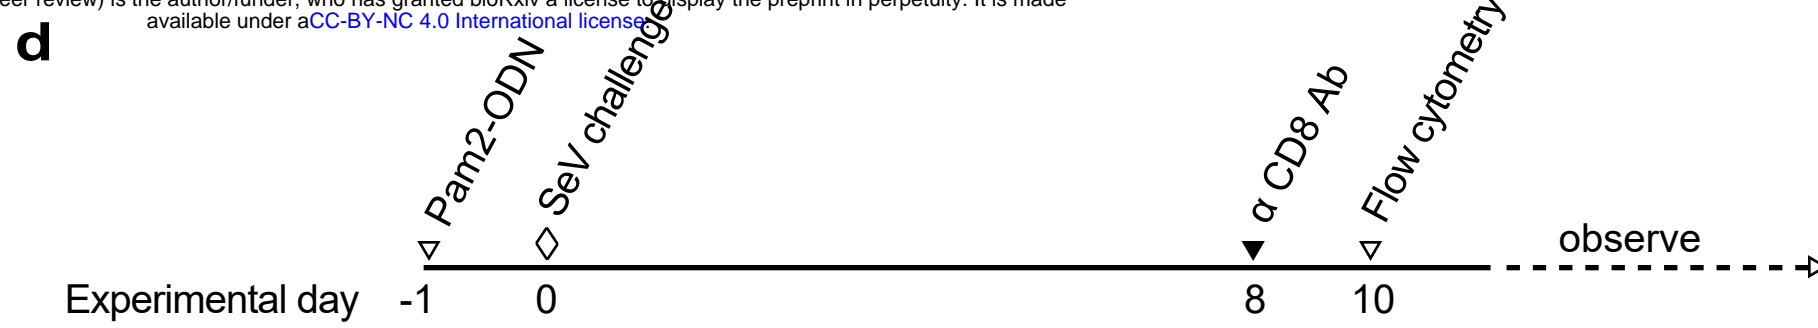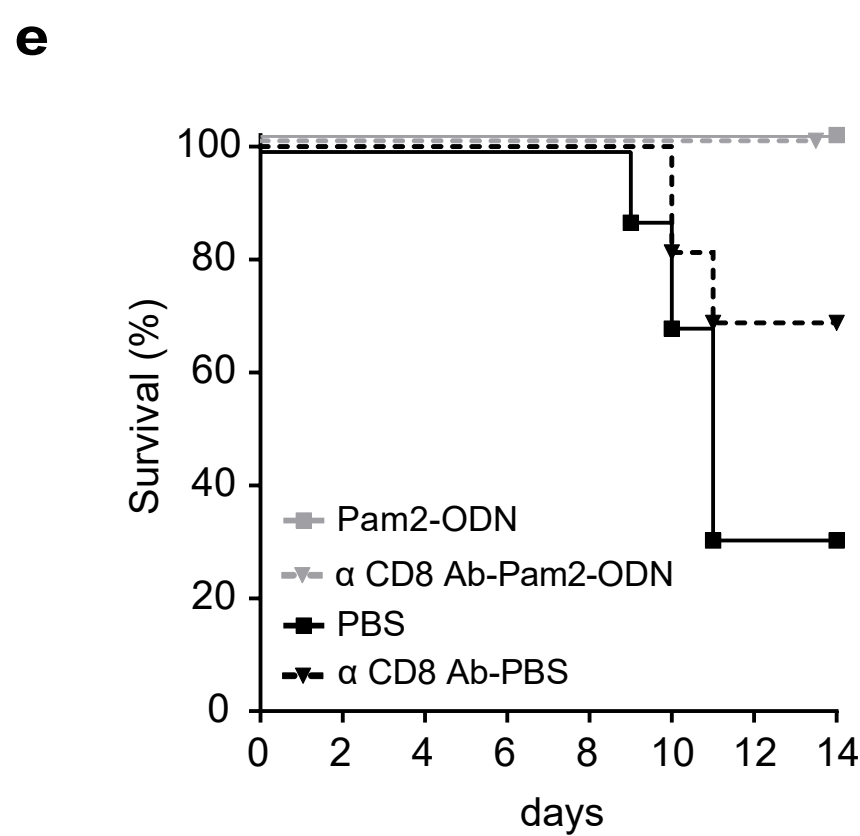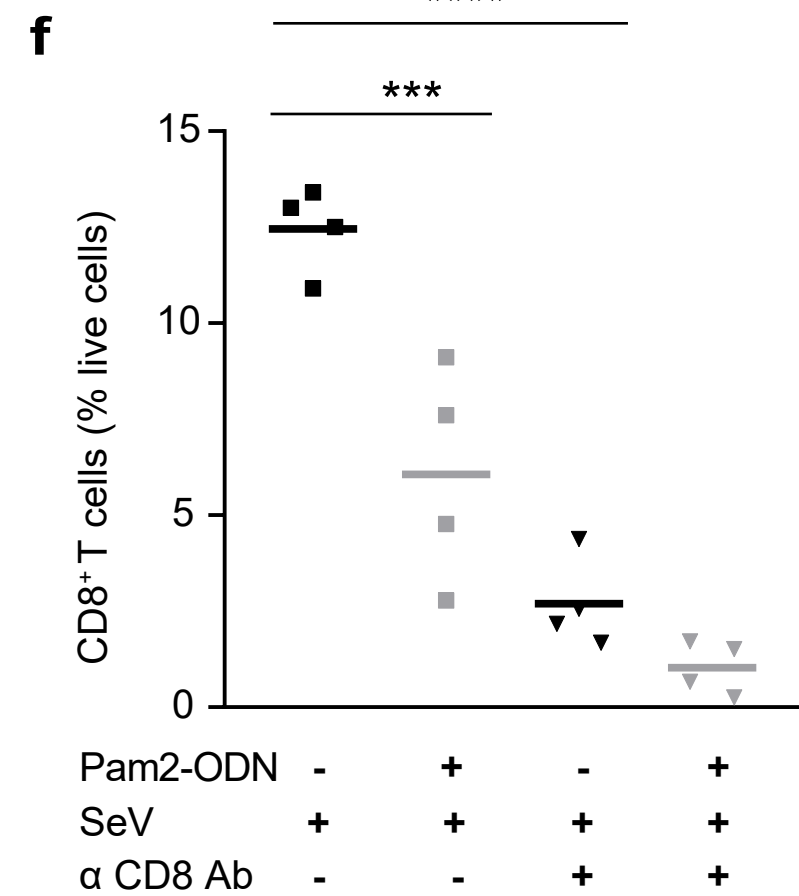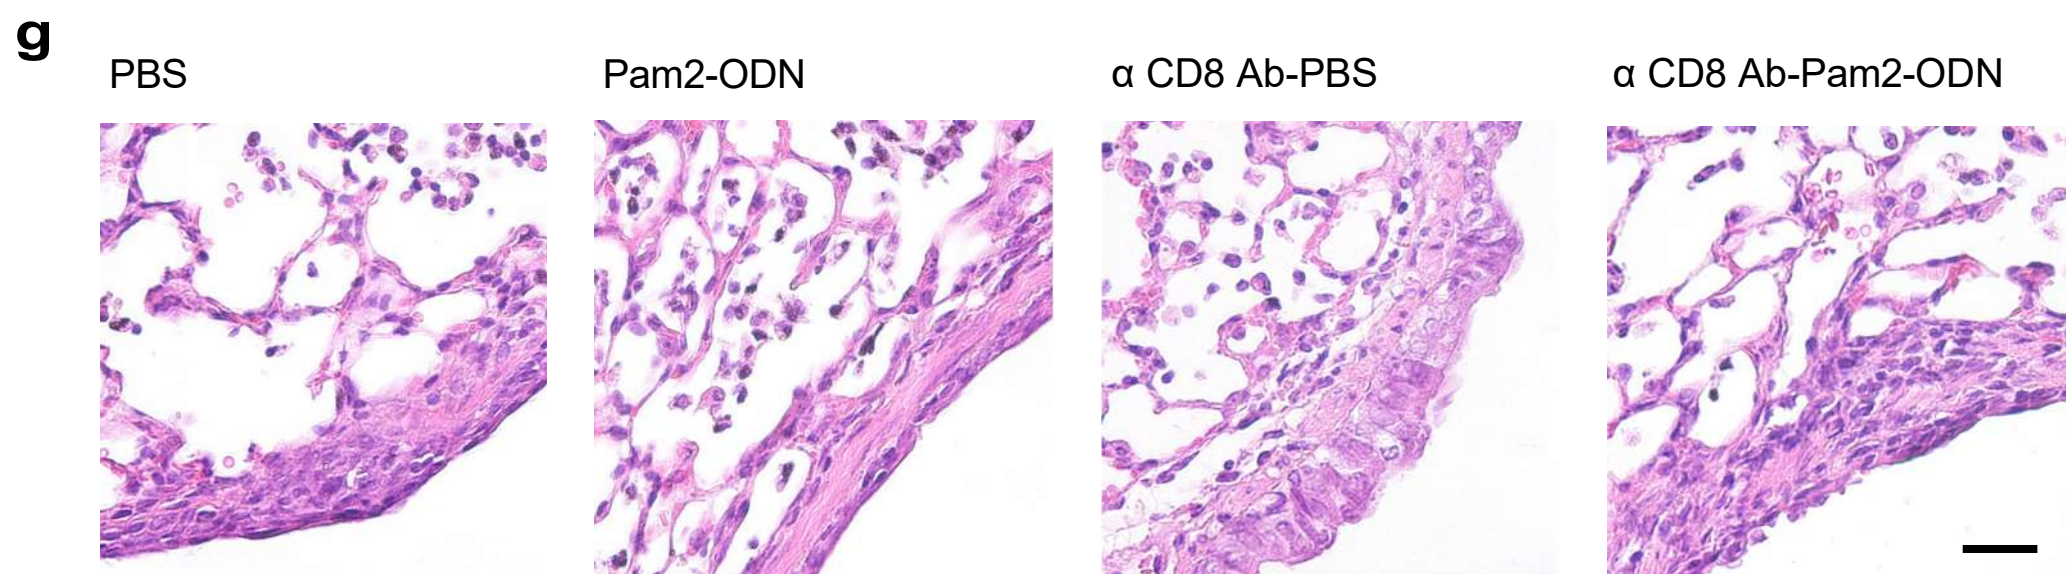

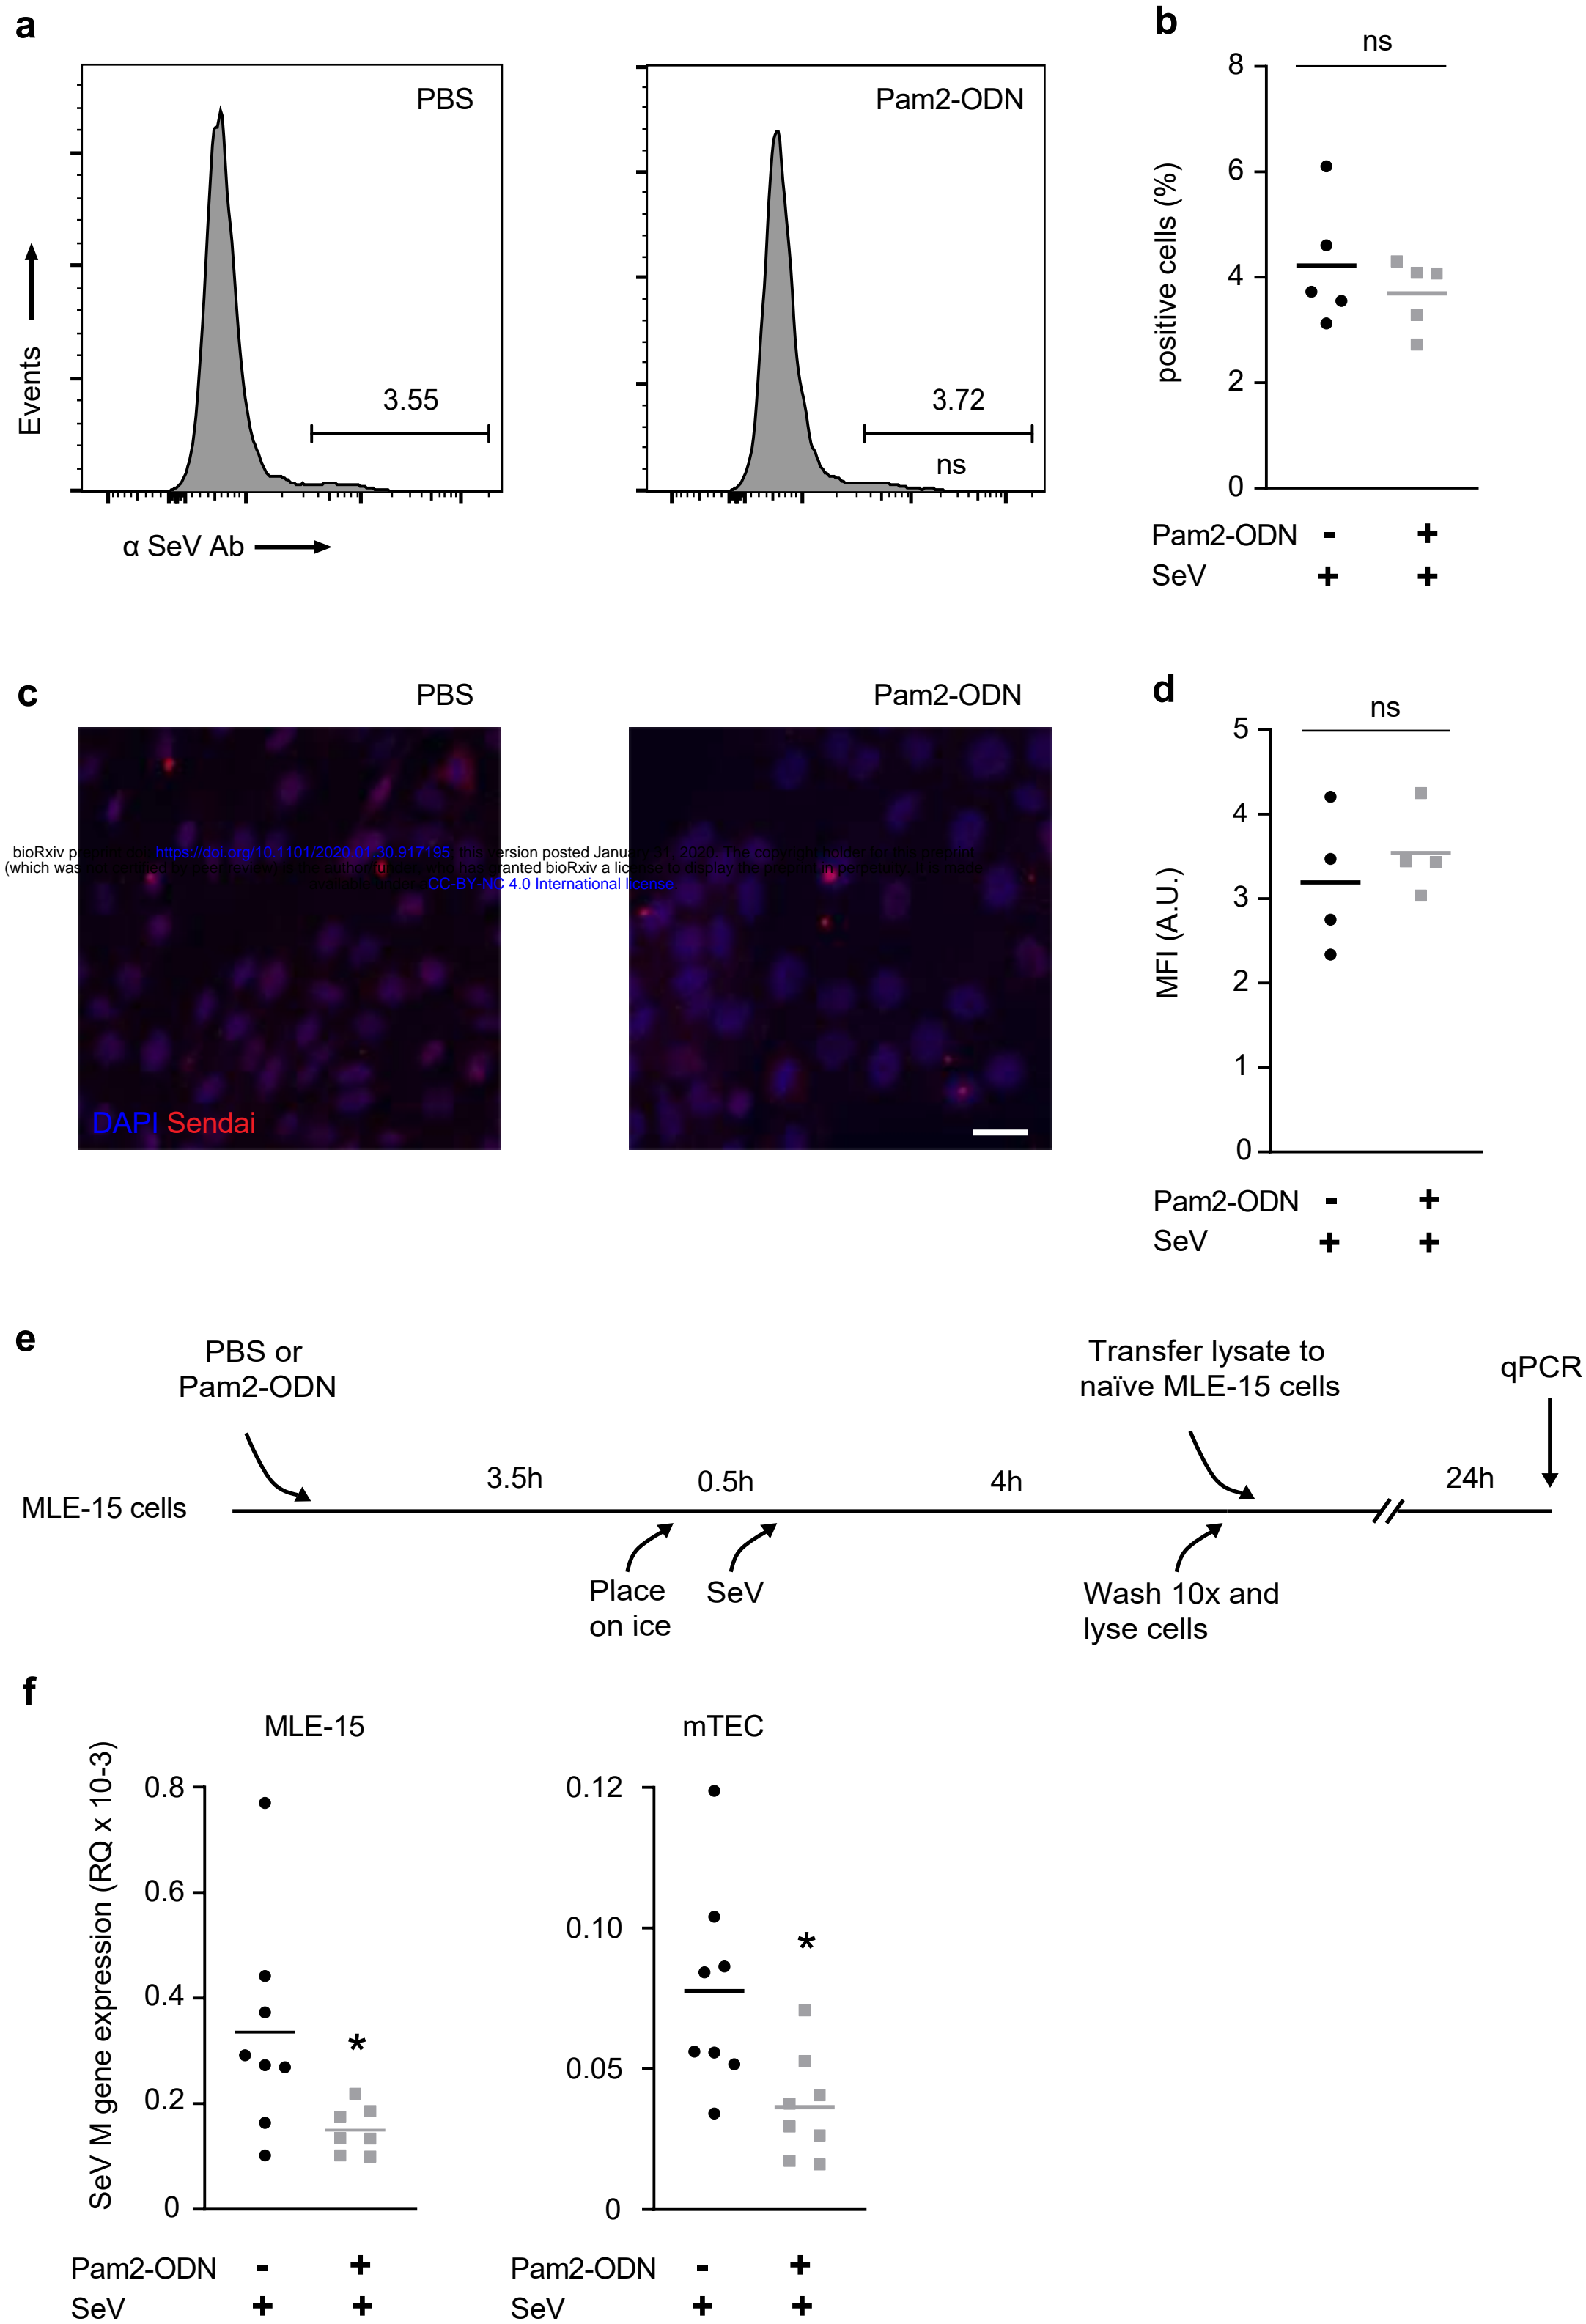



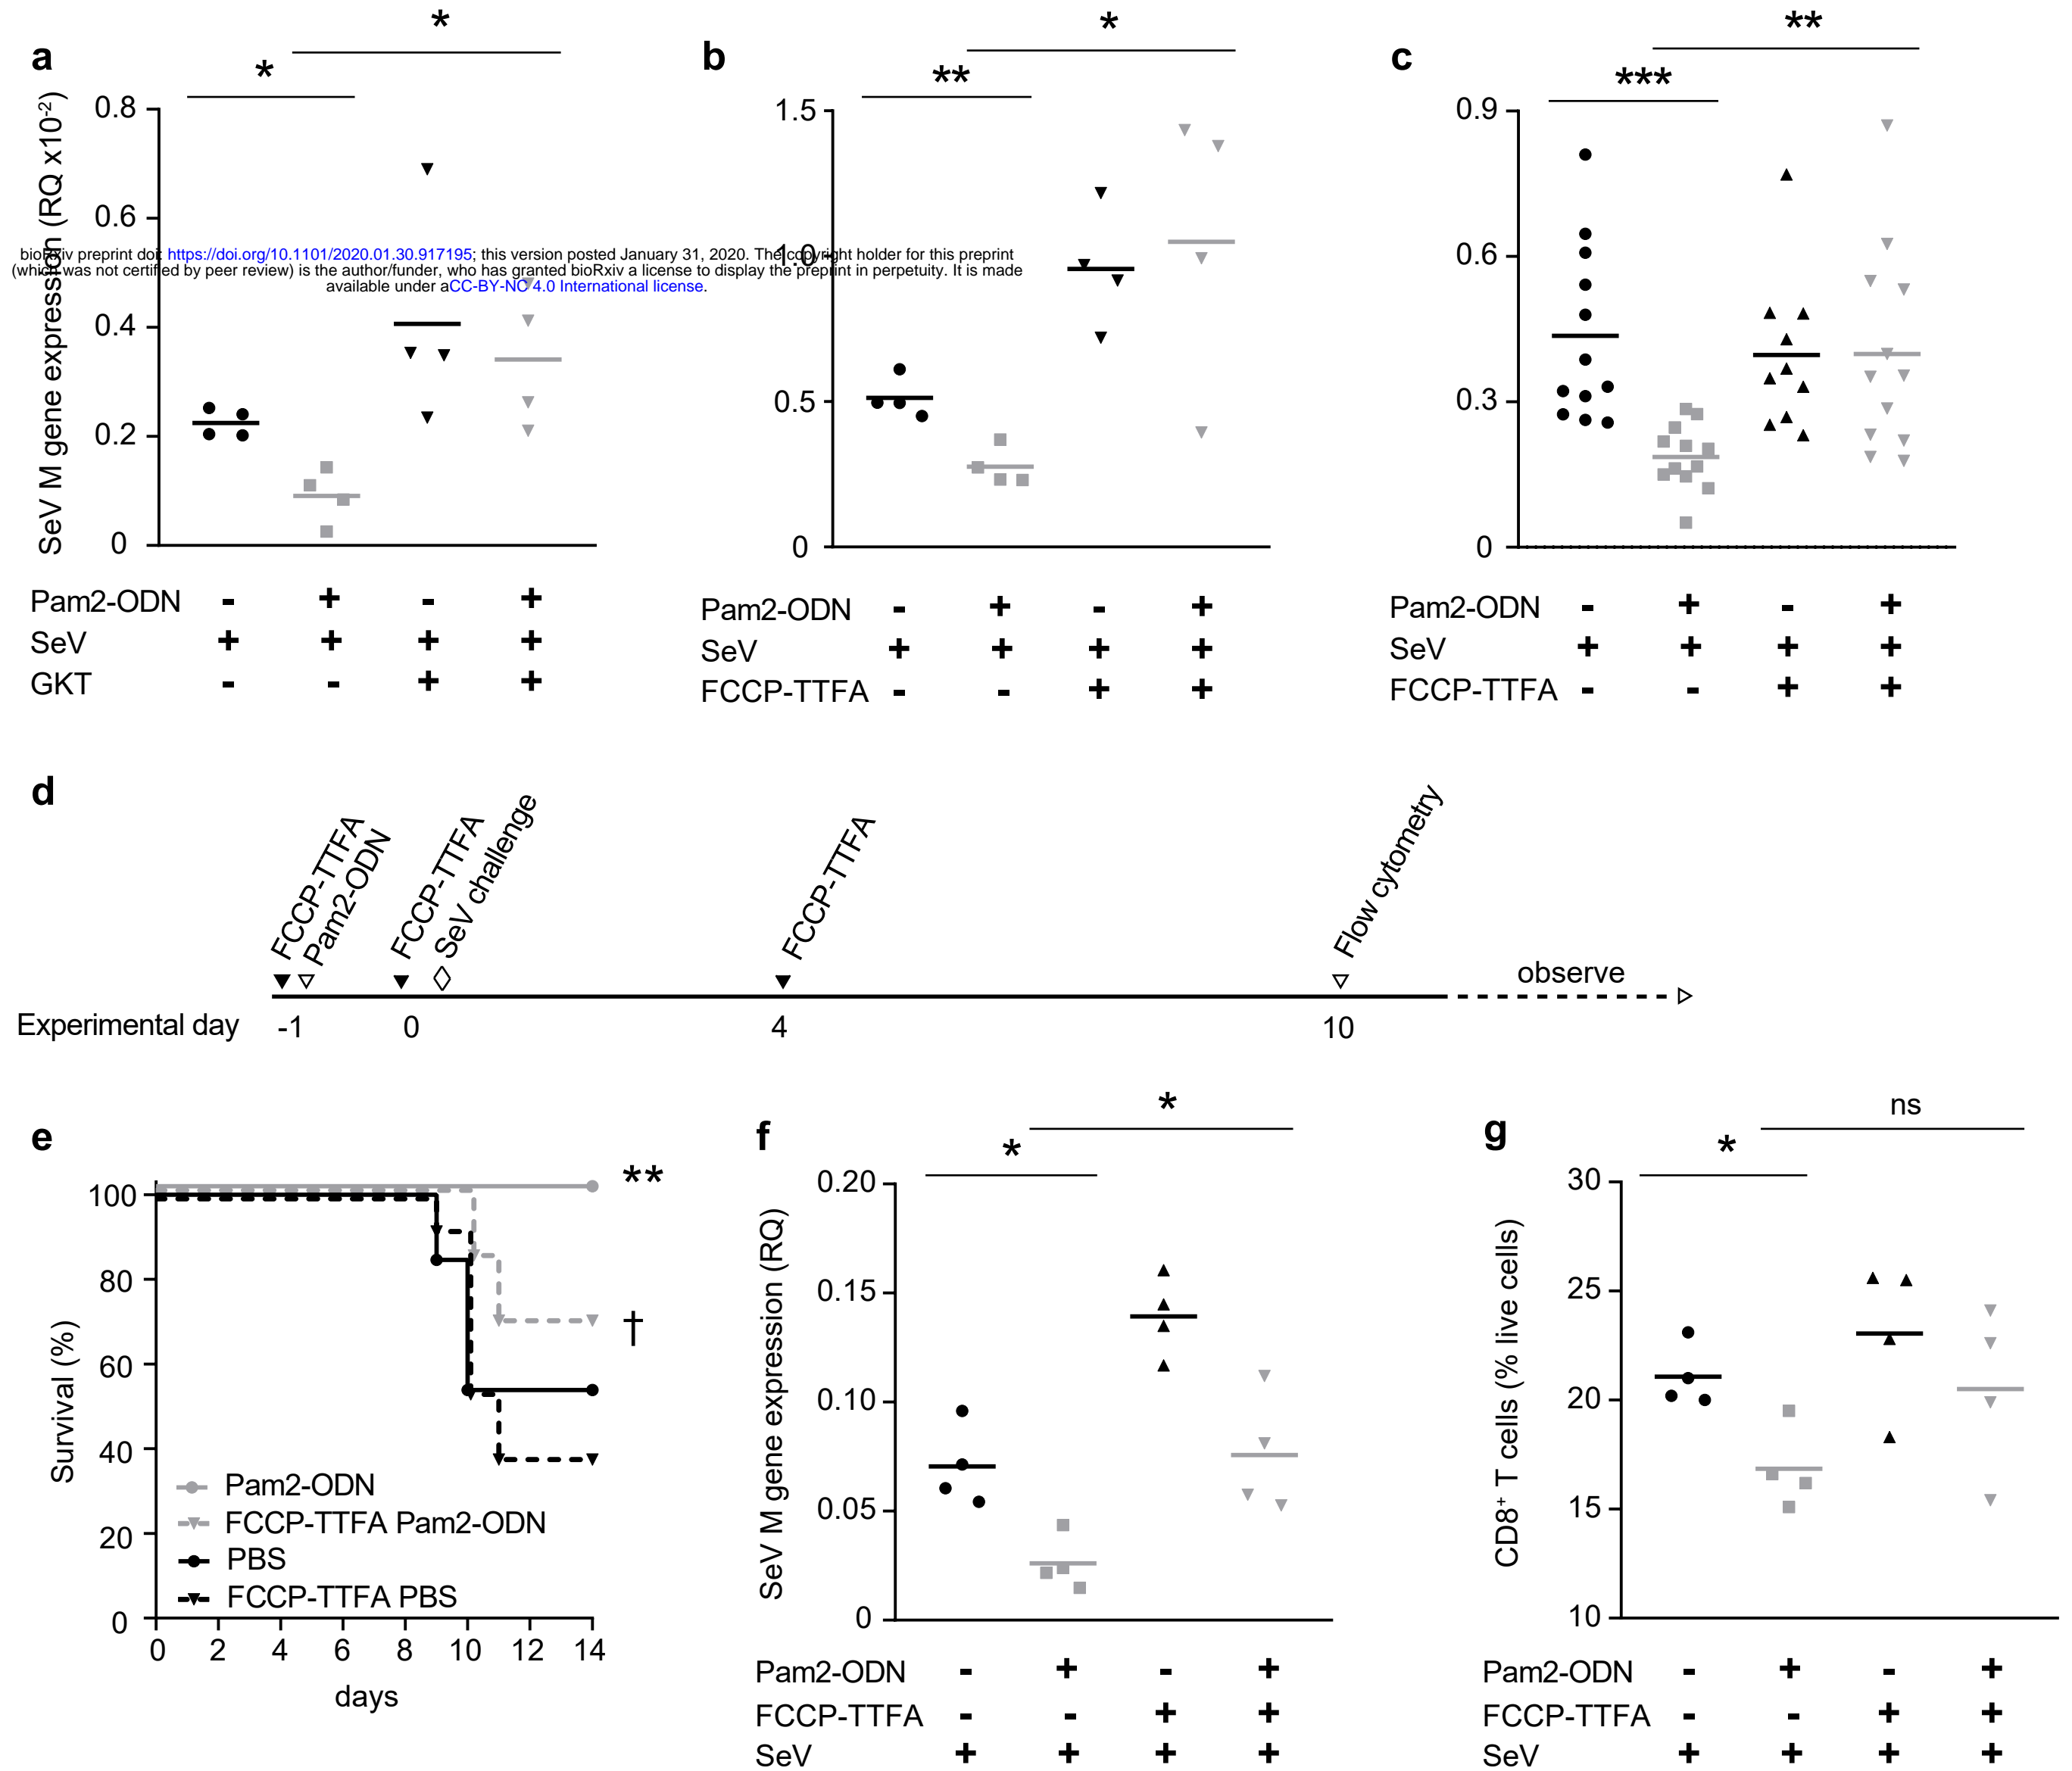

Wali, Supplementary Figure 1

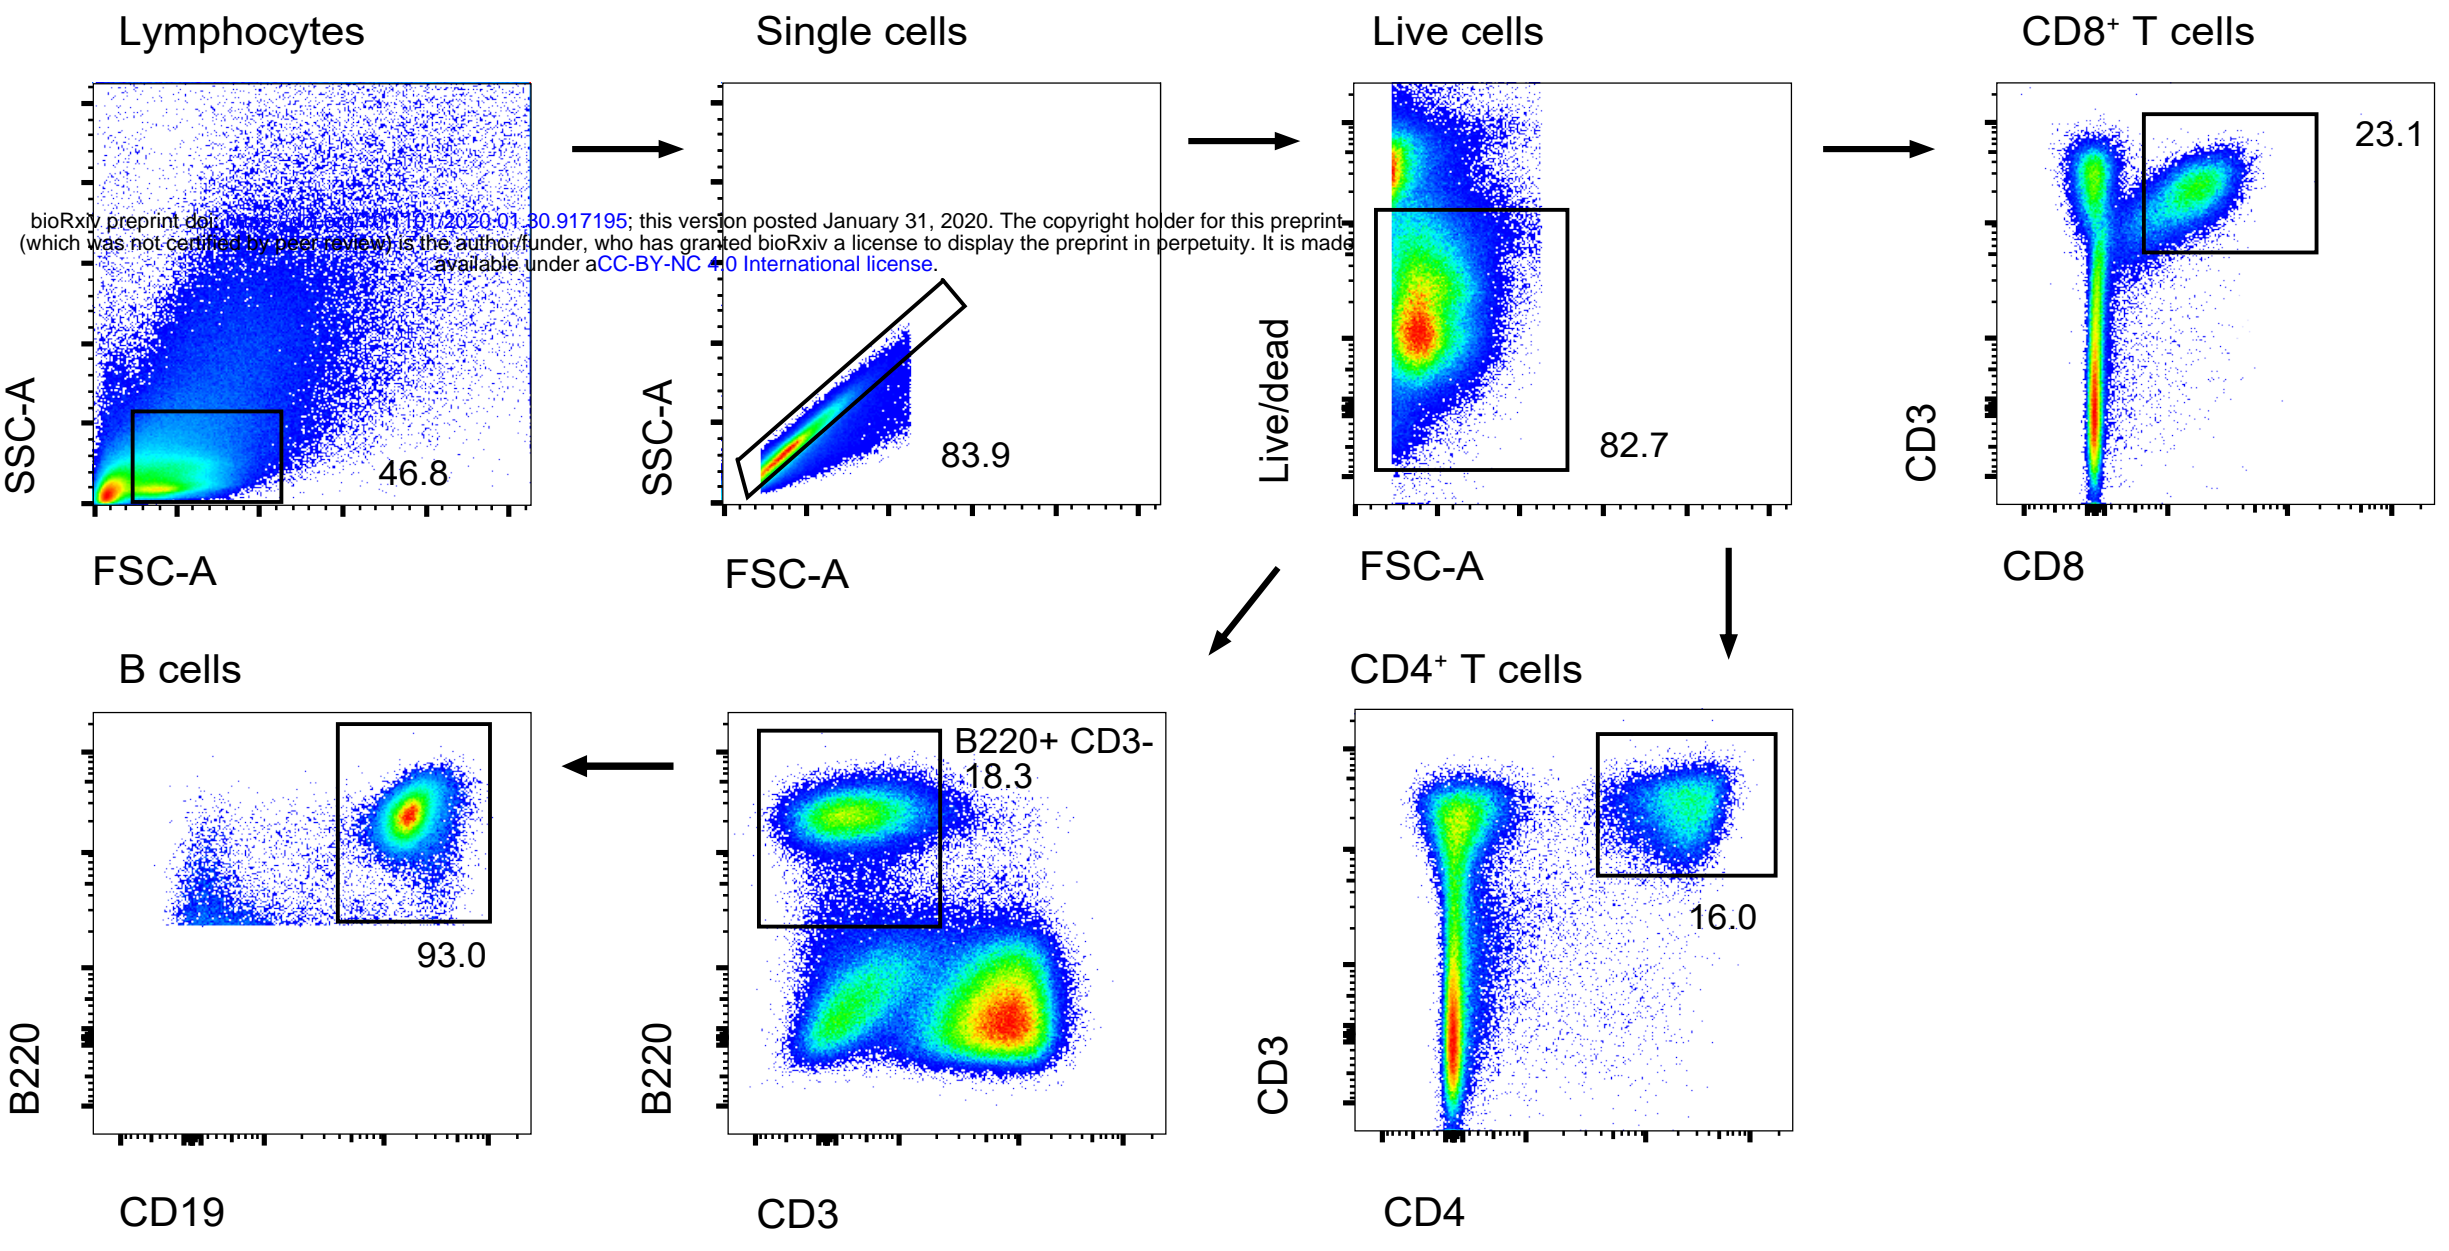

## Wali, Supplementary Figure 2

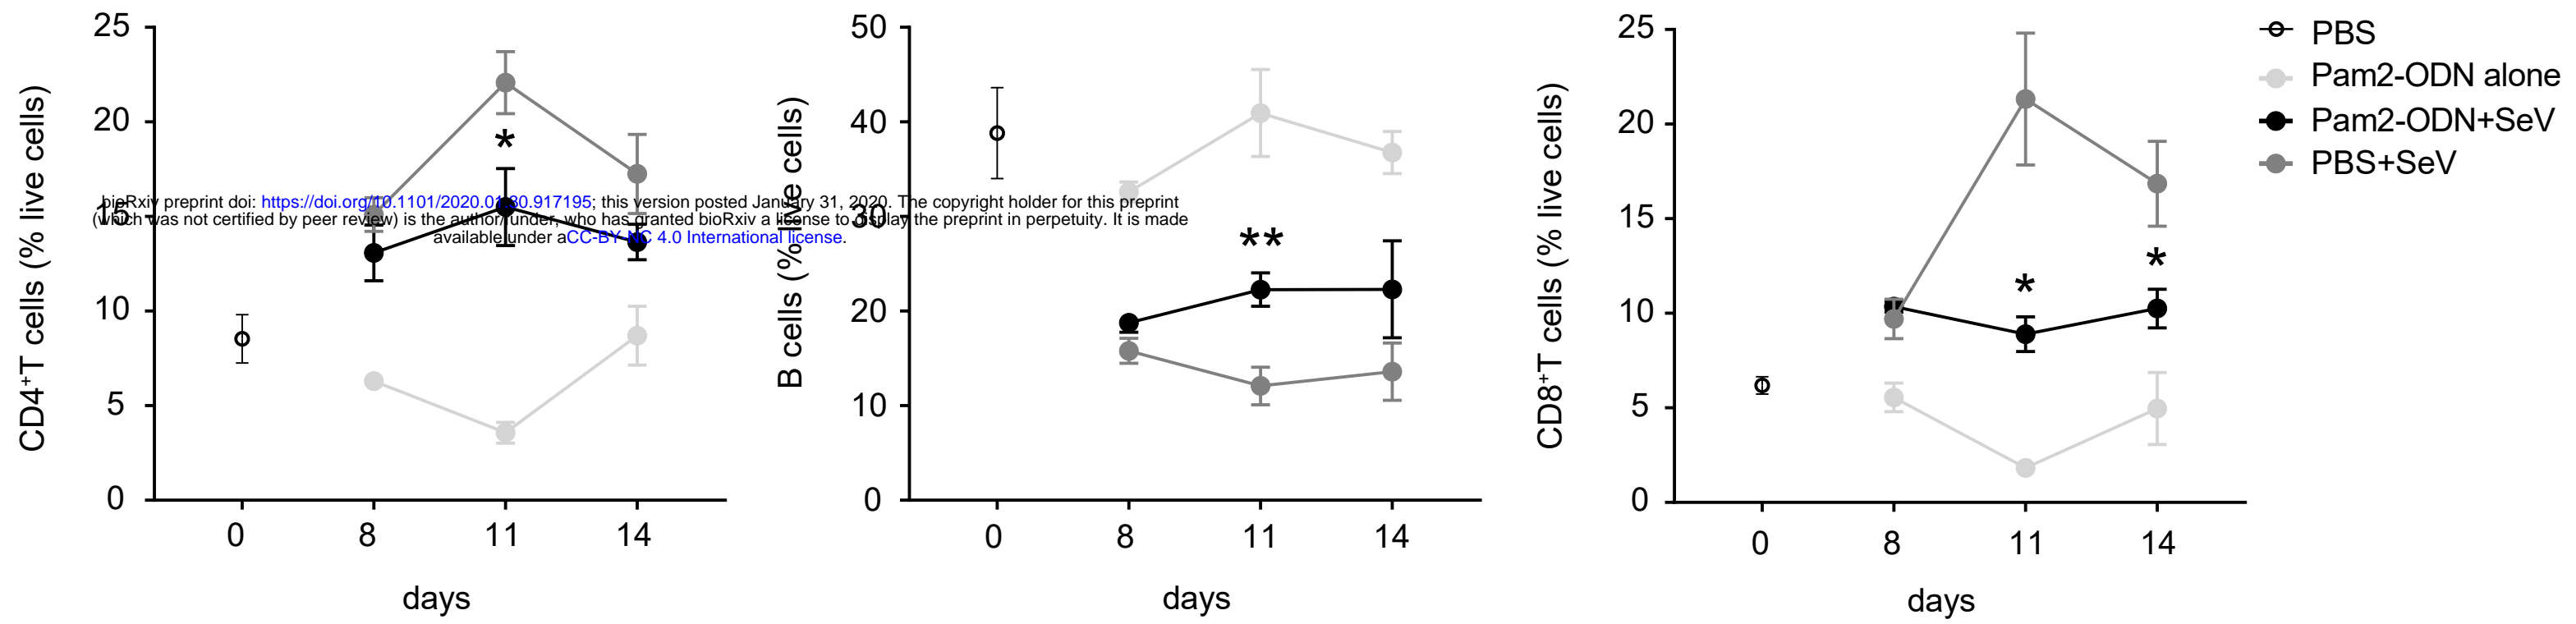

Non immune rat IgG2

depleting  $\alpha$  CD8 Ab

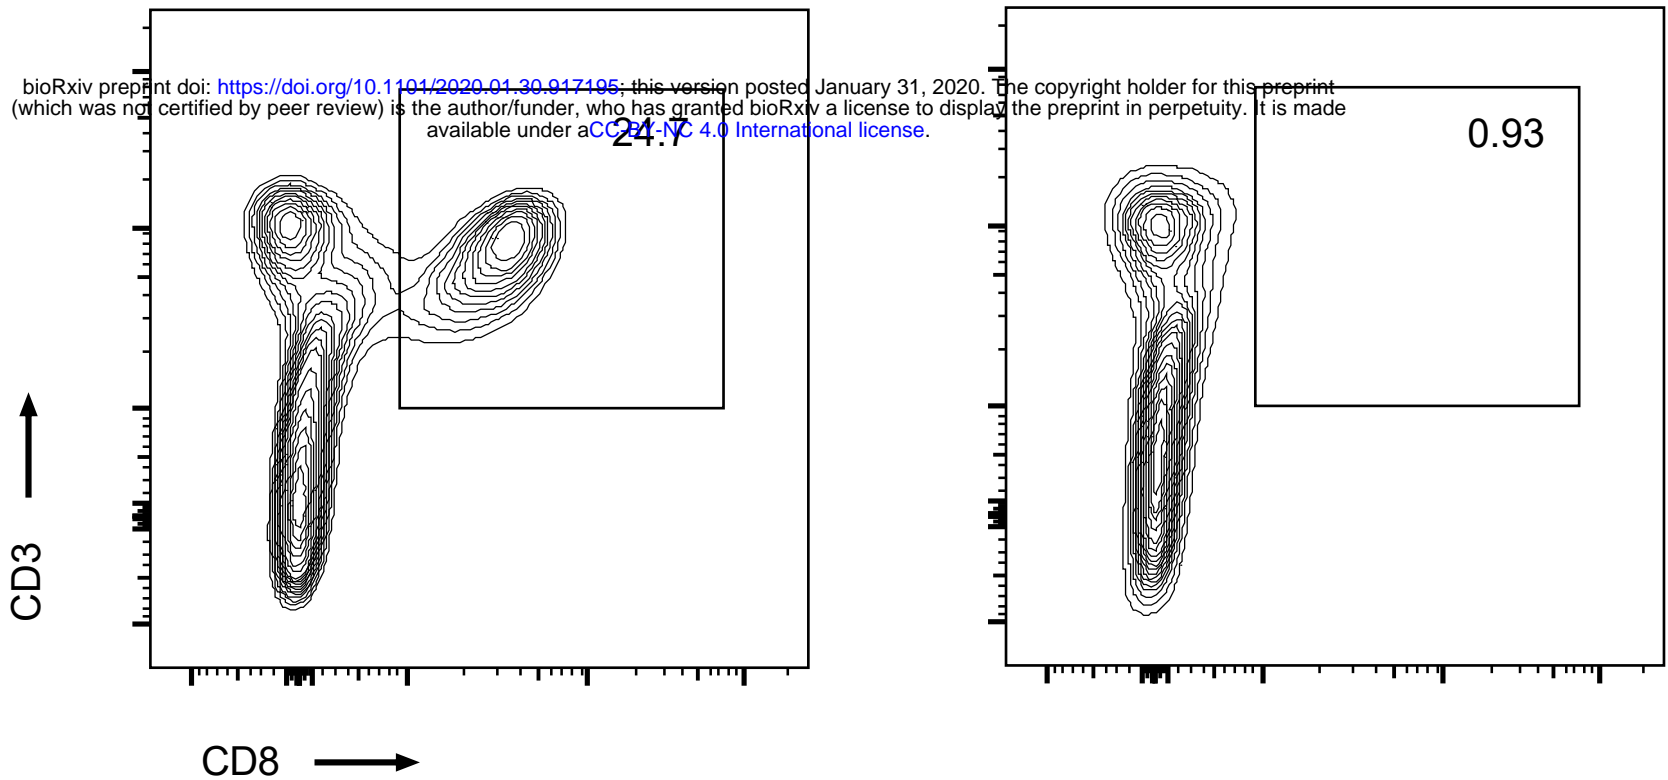

Wali, Supplementary Figure 4

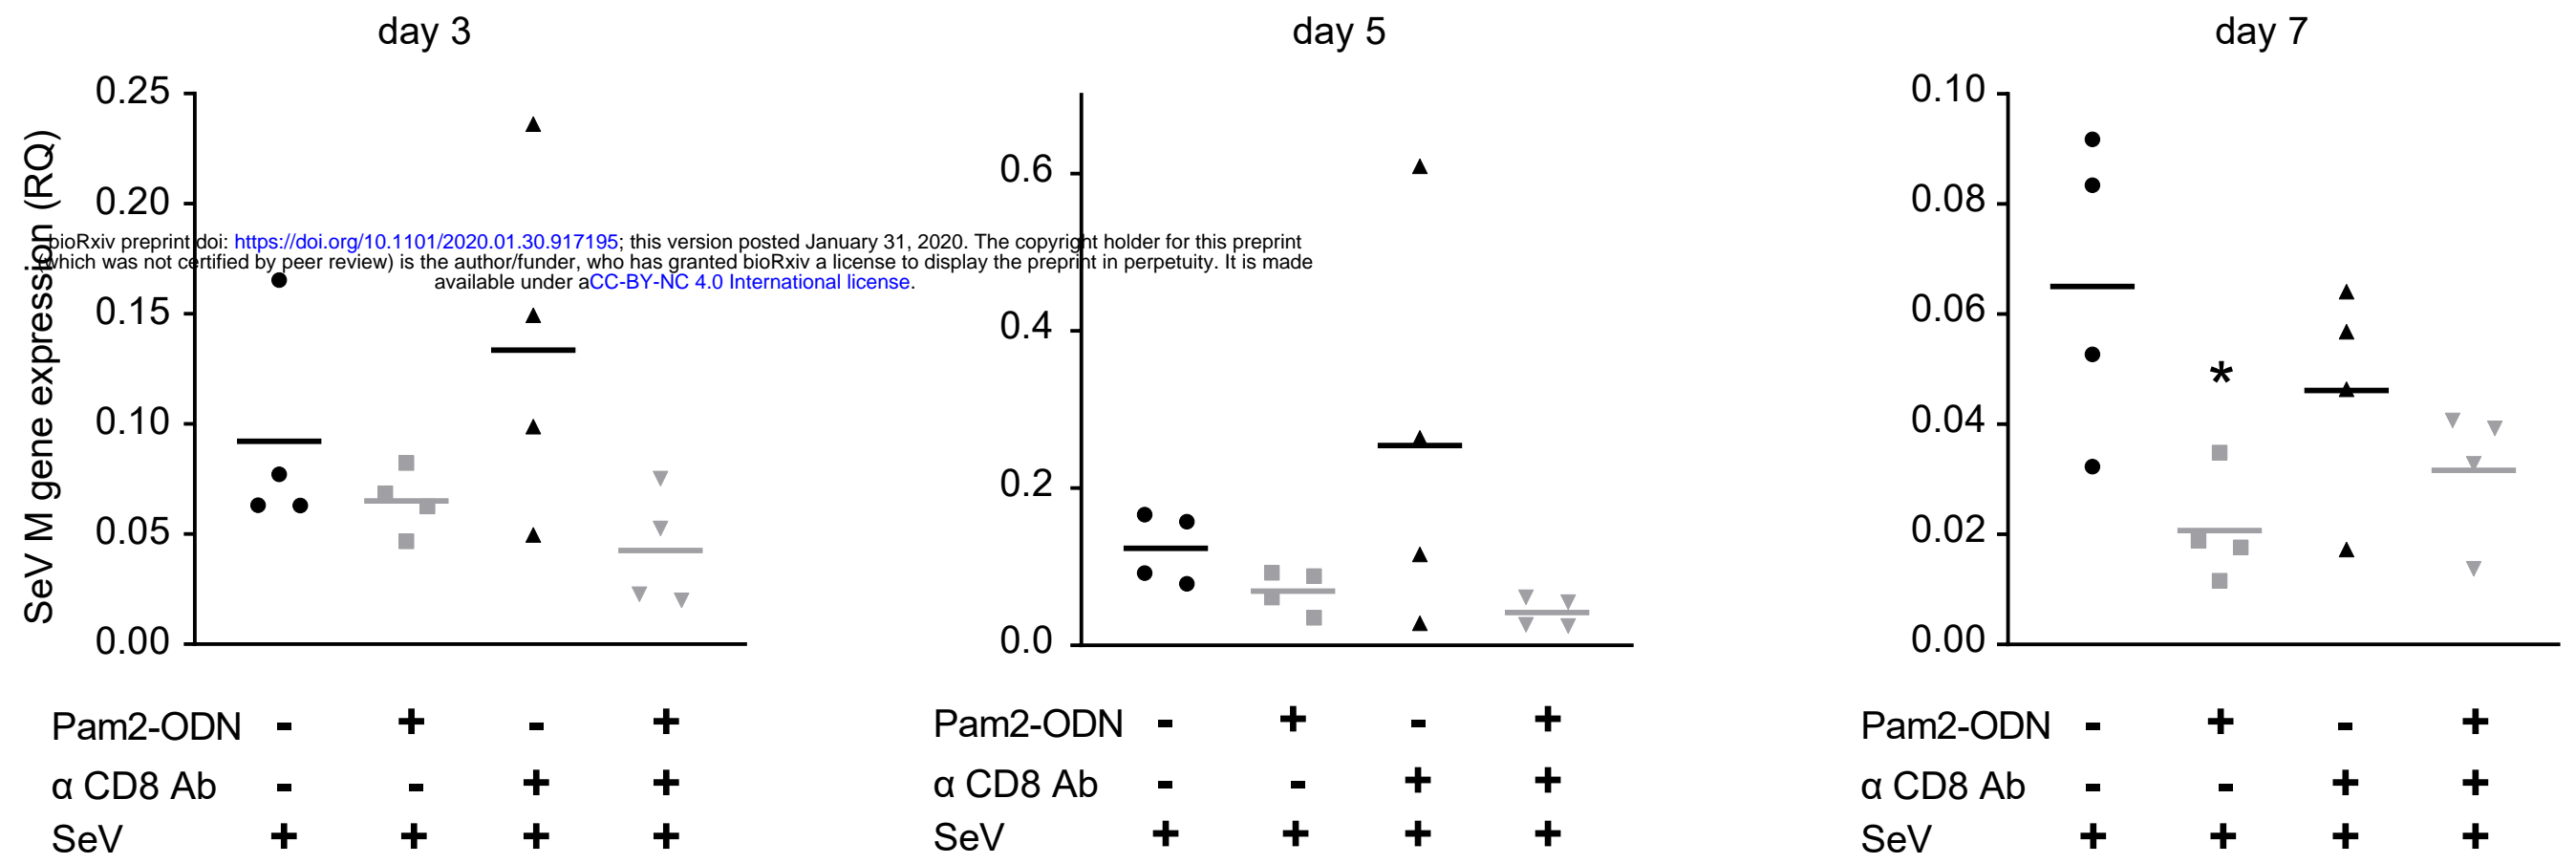

Source: http://biorxiv.org/content/10.1101/2020.01.30.917195v1.full.pdf
